# Supplementary material for: Filling the gaps in ecology of tropical tiger beetles (Coleoptera: Cicindelidae): first quantitative data of sexual dimorphism in semi-arboreal Therates from the Philippine biodiversity hotspot
Source: PeerJ. 2024 Mar 13;12:e16956. doi: 10.7717/peerj.16956 (PMC10944163; doi:10.7717/peerj.16956)
Supplement: Supplemental Information 1 [file peerj-12-16956-s001.xlsx]

## Sheet: Sheet1
Species	Sex	Weight (g)	Total Body Length_TBL (mm)	Width of elytra (normalized to TBL)	Length of elytra_EL (normalized to TBL)	Width of head _WH (normalized to TBL)	Width of pronotum_WP (normalized to TBL)	length of head_LH_(normalized to TBL)	Length of pronotum_LP (normalized to TBL)	right mandible length_RML (normalized to TBL)	labrum length_LL (normalized to TBL)
T.fulvipennis bidentatus	M	0.072	15.06	0.277556	0.561753	0.264276	0.179283	0.166003	0.175963	0.166667	0.0962815
T.fulvipennis bidentatus	F	0.066	14.65	0.274403	0.554266	0.260068	0.171331	0.168601	0.167235	0.169283	0.109898
T.fulvipennis bidentatus	M	0.071	14.27	0.269797	0.55431	0.274001	0.180799	0.156973	0.182901	0.168886	0.105816
T.fulvipennis bidentatus	M	0.078	14.98	0.263017	0.544059	0.257677	0.182911	0.169559	0.1749	0.180908	0.111482
T.fulvipennis bidentatus	M	0.089	15.06	0.26162	0.531208	0.263612	0.171315	0.162019	0.171979	0.183267	0.134794
T.fulvipennis bidentatus	M	0.081	15.12	0.267857	0.535714	0.265873	0.180556	0.178571	0.170635	0.150132	0.115079
T.fulvipennis bidentatus	F	0.011	15.21	0.251151	0.527942	0.261012	0.16831	0.185404	0.154504	0.174885	0.13215
T.fulvipennis bidentatus	F	0.079	14.45	0.278201	0.545329	0.259516	0.168858	0.166782	0.160554	0.157093	0.127336
T.fulvipennis bidentatus	M	0.074	14.5	0.26069	0.535172	0.262759	0.173793	0.175862	0.151034	0.185517	0.137931
T.fulvipennis bidentatus	M	0.082	14.67	0.269939	0.528971	0.263804	0.175187	0.164281	0.171779	0.170416	0.134969
T.fulvipennis bidentatus	M	0.103	15.23	0.310571	0.526592	0.261983	0.180565	0.154301	0.179908	0.187787	0.139199
T.fulvipennis bidentatus	F	0.089	14.72	0.27106	0.529212	0.261549	0.177989	0.173234	0.169837	0.180707	0.127717
T.fulvipennis bidentatus	M	0.075	14.48	0.273481	0.537983	0.262431	0.177486	0.15884	0.169199	0.179558	0.133978
T.fulvipennis bidentatus	M	0.088	14.91	0.258887	0.531187	0.266264	0.177062	0.156942	0.171026	0.169685	0.140845
T.fulvipennis bidentatus	M	0.085	15.5	0.267097	0.54	0.266452	0.179355	0.163226	0.176129	0.160645	0.120645
T.fulvipennis bidentatus	M	0.07	14.87	0.271688	0.546738	0.261601	0.173504	0.158036	0.171486	0.197041	0.123739
T.fulvipennis bidentatus	F	0.072	14.16	0.29096	0.555791	0.274718	0.180791	0.173729	0.173023	0.183616	0.0974576
T.fulvipennis bidentatus	F	0.063	13.38	0.293722	0.536622	0.284006	0.18012	0.192078	0.140508	0.183857	0.130792
T.fulvipennis bidentatus	F	0.08	14.75	0.282712	0.535593	0.27322	0.180339	0.16	0.174237	0.175593	0.130169
T.fulvipennis bidentatus	F	0.086	14.94	0.270415	0.535475	0.25502	0.170683	0.16332	0.165997	0.192102	0.135207
T.fulvipennis bidentatus	M	0.101	15.71	0.260344	0.547422	0.259707	0.179504	0.156588	0.168682	0.188415	0.127307
T.fulvipennis bidentatus	F	0.069	13.33	0.276819	0.538635	0.269317	0.171043	0.168792	0.172543	0.168792	0.12003
T.fulvipennis bidentatus	F	0.079	14.68	0.276567	0.550409	0.269074	0.1703	0.154632	0.160763	0.183924	0.134196
T.fulvipennis bidentatus	F	0.066	13.32	0.283033	0.555556	0.268769	0.179429	0.164414	0.167417	0.153153	0.112613
T.fulvipennis bidentatus	M	0.083	13.92	0.262931	0.540948	0.261494	0.179598	0.163075	0.176006	0.180316	0.119971
T.fulvipennis bidentatus	M	0.08	14.36	0.261142	0.530641	0.26532	0.174095	0.168524	0.171309	0.177577	0.129526
T.fulvipennis bidentatus	M	0.093	15.04	0.271941	0.521941	0.266622	0.181516	0.169548	0.168218	0.182181	0.140293
T.fulvipennis bidentatus	M	0.077	14.47	0.270214	0.535591	0.270214	0.179682	0.154112	0.181064	0.199032	0.129233
T.fulvipennis bidentatus	F	0.104	15.27	0.271775	0.538965	0.270465	0.177472	0.167649	0.169614	0.172233	0.123772
T.fulvipennis bidentatus	M	0.067	14.16	0.27048	0.537429	0.261299	0.176554	0.173729	0.170904	0.179379	0.117938
T.fulvipennis bidentatus	F	0.088	14.06	0.280939	0.541963	0.266003	0.179943	0.170697	0.174964	0.174253	0.112376
T.fulvipennis bidentatus	M	0.07	14.35	0.281533	0.556794	0.274564	0.184669	0.14007	0.174216	0.192334	0.12892
T.fulvipennis bidentatus	M	0.108	15.38	0.272432	0.536411	0.260728	0.180754	0.161248	0.172302	0.172952	0.130039
T.fulvipennis bidentatus	M	0.078	14.76	0.276423	0.544715	0.26897	0.175474	0.155149	0.172087	0.197154	0.128049
T.fulvipennis bidentatus	M	0.071	14.19	0.296688	0.556025	0.276251	0.181113	0.152925	0.180409	0.193094	0.110641
T.fulvipennis bidentatus	F	0.084	14.67	0.269257	0.533742	0.26244	0.171097	0.162918	0.166326	0.183367	0.137014
T.fulvipennis bidentatus	M	0.09	14.91	0.265594	0.548625	0.253521	0.169685	0.160966	0.165661	0.179074	0.124748
T.fulvipennis bidentatus	F	0.092	14.79	0.281271	0.545639	0.26572	0.174442	0.1643	0.1643	0.179175	0.125761
T.fulvipennis bidentatus	M	0.064	13.93	0.259134	0.534061	0.263441	0.170842	0.164382	0.16876	0.19453	0.132797
T.fulvipennis bidentatus	F	0.08	14.15	0.283392	0.546996	0.267845	0.177385	0.161837	0.14841	0.183746	0.142756
T.fulvipennis bidentatus	M	0.102	15.43	0.270901	0.526896	0.259883	0.180817	0.173688	0.170447	0.191834	0.12897
T.fulvipennis bidentatus	F	0.082	14.57	0.280027	0.544955	0.264928	0.175017	0.166095	0.168154	0.175704	0.120796
T.fulvipennis bidentatus	F	0.057	12.89	0.305663	0.556245	0.280838	0.179209	0.155159	0.172227	0.17533	0.116369
T.fulvipennis bidentatus	F	0.086	14.39	0.309937	0.533704	0.268937	0.168867	0.166782	0.165393	0.185546	0.134121
T.fulvipennis bidentatus	M	0.084	14.98	0.27036	0.528037	0.255007	0.173565	0.164887	0.169559	0.20227	0.137517
T.fulvipennis bidentatus	M	0.07	14.57	0.262183	0.540151	0.262869	0.174331	0.164036	0.171585	0.177076	0.124228
T.fulvipennis bidentatus	M	0.085	14.86	0.272544	0.551817	0.266487	0.176312	0.17362	0.163526	0.183715	0.111036
T.fulvipennis bidentatus	F	0.078	14.49	0.279503	0.559006	0.266391	0.176674	0.16011	0.169772	0.15528	0.111111
T.fulvipennis bidentatus	F	0.077	13.85	0.279422	0.533574	0.273646	0.174007	0.162455	0.163899	0.181949	0.140072
T.fulvipennis bidentatus	F	0.079	14.23	0.270555	0.532677	0.266339	0.176388	0.16163	0.172874	0.189037	0.132818
T.fulvipennis bidentatus	M	0.081	14.74	0.265265	0.543419	0.260516	0.182497	0.148575	0.173677	0.210991	0.134328
T.fulvipennis bidentatus	F	0.094	15.48	0.273902	0.536176	0.266796	0.176357	0.170543	0.167959	0.178295	0.125323
T.fulvipennis bidentatus	M	0.09	14.83	0.25826	0.526635	0.260958	0.172623	0.16116	0.171949	0.201618	0.140256
T.fulvipennis bidentatus	F	0.059	12.61	0.291832	0.528945	0.286281	0.180016	0.1705	0.164155	0.191118	0.1364
T.fulvipennis bidentatus	F	0.087	14.58	0.270919	0.534979	0.258573	0.168038	0.166667	0.165981	0.1893	0.132373
T.fulvipennis bidentatus	M	0.082	14.7	0.263265	0.554422	0.262585	0.182993	0.156463	0.171429	0.180952	0.117687
T.fulvipennis bidentatus	M	0.089	14.68	0.268392	0.532016	0.251362	0.179155	0.166213	0.168937	0.196866	0.132834
T.fulvipennis bidentatus	M	0.078	14.78	0.268606	0.548714	0.257104	0.175237	0.144114	0.17253	0.194181	0.134641
T.fulvipennis bidentatus	F	0.016	13.93	0.275664	0.54056	0.26346	0.173726	0.176597	0.160804	0.17229	0.122039
T.fulvipennis bidentatus	M	0.094	15.06	0.265604	0.539177	0.25498	0.170651	0.160691	0.167995	0.197875	0.132138
T.fulvipennis bidentatus	F	0.067	13.87	0.304254	0.547945	0.272531	0.170151	0.1615	0.172314	0.170151	0.118241
T.fulvipennis bidentatus	M	0.097	15.45	0.262783	0.537217	0.264078	0.182524	0.158576	0.174757	0.178641	0.12945
T.fulvipennis bidentatus	F	0.086	14.91	0.276325	0.52381	0.256204	0.173709	0.17438	0.170355	0.185111	0.131455
T.fulvipennis bidentatus	M	0.09	15.12	0.268519	0.529762	0.268519	0.177249	0.166005	0.173942	0.190476	0.130291
T.fulvipennis bidentatus	M	0.059	13.35	0.27191	0.561798	0.270412	0.174532	0.163296	0.172285	0.192509	0.102622
T.fulvipennis bidentatus	F	0.072	14.25	0.273684	0.546667	0.268772	0.177544	0.167719	0.164912	0.184561	0.120702
T.fulvipennis bidentatus	F	0.082	14.88	0.274866	0.530242	0.268145	0.176075	0.166667	0.165995	0.192876	0.137097
T.fulvipennis bidentatus	F	0.053	12.77	0.285043	0.534847	0.28426	0.179327	0.172279	0.169146	0.179327	0.123727
T.fulvipennis bidentatus	M	0.086	14.6	0.269863	0.540411	0.262329	0.175342	0.175342	0.165753	0.167808	0.118493
T.fulvipennis bidentatus	M	0.1	15.42	0.300908	0.557069	0.264591	0.174449	0.156939	0.169909	0.178988	0.116083
T.fulvipennis bidentatus	M	0.066	13.36	0.27021	0.560629	0.267964	0.181886	0.154192	0.172156	0.172156	0.113024
T.fulvipennis bidentatus	F	0.074	14.61	0.275154	0.525667	0.275838	0.182752	0.162902	0.1718	0.188227	0.13963
T.fulvipennis bidentatus	F	0.102	16.17	0.290043	0.545455	0.252319	0.16945	0.15337	0.166357	0.1812	0.134818
T.fulvipennis bidentatus	M	0.047	15.47	0.263736	0.52618	0.252747	0.167421	0.164835	0.171299	0.191338	0.137686
T.fulvipennis bidentatus	M	0.081	14.3	0.259441	0.527972	0.260839	0.174825	0.158741	0.170629	0.194406	0.142657
T.fulvipennis bidentatus	F	0.082	14.57	0.275909	0.540151	0.260124	0.167467	0.159231	0.164036	0.185312	0.136582
T.fulvipennis bidentatus	M	0.092	15.44	0.270725	0.533031	0.262953	0.176813	0.159974	0.170337	0.198834	0.136658
T.fulvipennis bidentatus	F	0.081	15.33	0.281148	0.541422	0.262883	0.172211	0.156556	0.161774	0.185258	0.140248
T.fulvipennis bidentatus	F	0.073	14.44	0.275623	0.536704	0.263158	0.136427	0.176593	0.157202	0.177978	0.129501
T.fulvipennis bidentatus	F	0.073	14.81	0.282917	0.533423	0.264011	0.180284	0.166779	0.167454	0.187711	0.132343
T.fulvipennis bidentatus	F	0.069	13.78	0.275036	0.550073	0.271408	0.174165	0.16328	0.170537	0.181422	0.11611
T.fulvipennis bidentatus	M	0.1	15.32	0.265013	0.538512	0.263055	0.180157	0.157311	0.172324	0.191253	0.131854
T.fulvipennis bidentatus	M	0.076	14.83	0.260283	0.54147	0.263655	0.173297	0.149697	0.168577	0.197572	0.140256
T.fulvipennis bidentatus	M	0.089	14.51	0.272915	0.518952	0.270159	0.184011	0.164025	0.172295	0.200551	0.144728
T.fulvipennis bidentatus	F	0.071	14.2	0.276056	0.542958	0.26831	0.174648	0.157042	0.170423	0.18662	0.129577
T.fulvipennis bidentatus	M	0.089	15.42	0.26978	0.546044	0.263294	0.175746	0.156939	0.164073	0.197147	0.132944
T.fulvipennis bidentatus	M	0.102	15.18	0.266798	0.537549	0.262187	0.173913	0.160079	0.173254	0.197628	0.129117
T.fulvipennis bidentatus	M	0.09	14.95	0.264883	0.541806	0.256187	0.176589	0.153846	0.178595	0.18194	0.125753
T.fulvipennis bidentatus	M	0.092	14.89	0.266622	0.538617	0.258563	0.179315	0.159839	0.170584	0.204164	0.13096
T.fulvipennis bidentatus	F	0.068	13.69	0.279766	0.538349	0.265157	0.172389	0.164354	0.168006	0.178963	0.129291
T.fulvipennis bidentatus	M	0.065	13.97	0.269864	0.534001	0.27058	0.184681	0.171081	0.173228	0.183966	0.121689
T.fulvipennis bidentatus	M	0.077	14.19	0.270613	0.548273	0.271318	0.182523	0.157153	0.162086	0.204369	0.132488
T.fulvipennis bidentatus	M	0.066	13.52	0.272189	0.539201	0.275888	0.178254	0.170118	0.176036	0.156805	0.114645
T.fulvipennis bidentatus	F	0.049	13.11	0.290618	0.558352	0.266209	0.174676	0.156369	0.15942	0.19222	0.125858
T.fulvipennis bidentatus	F	0.069	14.4	0.277083	0.533333	0.259028	0.173611	0.160417	0.172222	0.193056	0.134028
T.fulvipennis bidentatus	F	0.067	14.26	0.286816	0.551192	0.26648	0.173212	0.154278	0.164797	0.18864	0.129734
T.fulvipennis bidentatus	F	0.083	14.39	0.275886	0.534399	0.272411	0.174427	0.165393	0.165393	0.192495	0.134816
T.fulvipennis bidentatus	M	0.078	14.9	0.269128	0.536242	0.26443	0.181879	0.171141	0.17047	0.174497	0.122148
T.fulvipennis bidentatus	M	0.081	14.59	0.274846	0.540781	0.260452	0.18026	0.155586	0.167923	0.196025	0.135709
T.fulvipennis bidentatus	M	0.085	14.42	0.268377	0.536061	0.269764	0.177531	0.160888	0.174064	0.158807	0.128988
T.fulvipennis bidentatus	M	0.085	14.59	0.304318	0.547635	0.263879	0.183002	0.161069	0.169294	0.185058	0.122001
T.fulvipennis bidentatus	F	0.096	14.8	0.272973	0.524324	0.266892	0.182432	0.165541	0.170946	0.193243	0.139189
T.fulvipennis bidentatus	F	0.09	14.59	0.293352	0.550377	0.267306	0.176148	0.159013	0.163811	0.200822	0.126799
T.fulvipennis bidentatus	M	0.086	15.55	0.266238	0.540836	0.250804	0.178135	0.153055	0.169775	0.193569	0.136334
T.fulvipennis bidentatus	F	0.072	13.76	0.284884	0.539971	0.275436	0.183866	0.159884	0.167878	0.183866	0.132267
T.fulvipennis bidentatus	M	0.07	14.27	0.2726	0.530484	0.269096	0.177996	0.173791	0.170988	0.210932	0.124737
T.fulvipennis bidentatus	M	0.104	15.86	0.262926	0.547919	0.257881	0.179697	0.139975	0.175284	0.196721	0.136822
T.fulvipennis bidentatus	M	0.078	14.09	0.300923	0.554294	0.268275	0.17885	0.150461	0.174592	0.188786	0.120653
T.fulvipennis bidentatus	M	0.108	15.62	0.275288	0.543534	0.263764	0.179898	0.165173	0.170935	0.183739	0.120359
T.fulvipennis bidentatus	M	0.095	15.73	0.260013	0.528926	0.252384	0.175461	0.158932	0.169739	0.189447	0.142403
T.fulvipennis bidentatus	M	0.075	13.28	0.270331	0.548193	0.268825	0.177711	0.156627	0.174699	0.177711	0.120482
T.fulvipennis bidentatus	M	0.095	14.74	0.28019	0.540027	0.266621	0.175712	0.157395	0.173677	0.193351	0.128901
T.fulvipennis bidentatus	M	0.094	14.72	0.274457	0.559103	0.262228	0.177989	0.154212	0.170516	0.16712	0.116168
T.fulvipennis bidentatus	M	0.071	13.26	0.285822	0.544495	0.273756	0.180995	0.171192	0.180995	0.179487	0.103318
T.fulvipennis bidentatus	F	0.057	13.2	0.265152	0.535606	0.25303	0.165909	0.174242	0.160606	0.181061	0.129545
T.fulvipennis bidentatus	M	0.094	15.22	0.272011	0.526281	0.25887	0.176741	0.170828	0.166886	0.19251	0.136005
T.fulvipennis bidentatus	M	0.067	13.63	0.272194	0.527513	0.261922	0.17755	0.152605	0.17755	0.212032	0.142333
T.fulvipennis bidentatus	M	0.104	15.74	0.262389	0.532402	0.260483	0.17662	0.15629	0.168996	0.19568	0.142313
T.fulvipennis bidentatus	M	0.1	15.15	0.268647	0.534653	0.258746	0.178218	0.159736	0.173597	0.19802	0.132013
T.fulvipennis bidentatus	F	0.084	14.64	0.281421	0.534836	0.262295	0.16735	0.157104	0.163934	0.186475	0.144126
T.fulvipennis bidentatus	M	0.093	15.06	0.281541	0.545153	0.269588	0.182603	0.164675	0.172643	0.181939	0.11753
T.fulvipennis bidentatus	M	0.081	14.6	0.269178	0.536986	0.255479	0.171918	0.14863	0.173973	0.194521	0.140411
T.fulvipennis bidentatus	F	0.067	13.42	0.275708	0.534277	0.269747	0.171386	0.162444	0.163934	0.19225	0.139344
T.fulvipennis bidentatus	F	0.079	14.51	0.276361	0.543763	0.262578	0.172984	0.148174	0.168849	0.19366	0.139214
T.fulvipennis bidentatus	F	0.077	13.34	0.295352	0.525487	0.277361	0.176912	0.168666	0.173163	0.191154	0.132684
T.fulvipennis bidentatus	M	0.085	14.71	0.265806	0.528892	0.265806	0.174711	0.173351	0.166553	0.182869	0.131203
T.fulvipennis bidentatus	M	0.083	14.96	0.256016	0.537433	0.27139	0.179813	0.161096	0.165107	0.199866	0.136364
T.fulvipennis bidentatus	M	0.095	15.71	0.269892	0.544239	0.252069	0.168046	0.155952	0.161044	0.190325	0.138765
T.fulvipennis bidentatus	M	0.085	14.49	0.254658	0.547274	0.26087	0.169772	0.154589	0.162181	0.197378	0.135956
T.fulvipennis bidentatus	M	0.079	14.17	0.262526	0.53211	0.266761	0.179252	0.1729	0.169372	0.189132	0.125618
T.fulvipennis bidentatus	M	0.092	14.88	0.264785	0.536962	0.260081	0.174731	0.163306	0.170027	0.193548	0.129704
T.fulvipennis bidentatus	F	0.096	15.06	0.27158	0.527224	0.260956	0.166667	0.172643	0.158699	0.183931	0.141434
T.fulvipennis bidentatus	M	0.105	15.64	0.263427	0.528133	0.259591	0.178389	0.15665	0.169437	0.207161	0.14578
T.fulvipennis bidentatus	M	0.1	15.25	0.262295	0.540984	0.263607	0.17377	0.156721	0.166557	0.2	0.135738
T.fulvipennis bidentatus	F	0.077	14.08	0.277699	0.534091	0.264205	0.169744	0.159801	0.165483	0.193182	0.140625
T.fulvipennis bidentatus	F	0.082	14.18	0.297602	0.537377	0.271509	0.172779	0.154443	0.170663	0.17842	0.137518
T.fulvipennis bidentatus	M	0.097	15.14	0.264201	0.541612	0.262219	0.18362	0.162483	0.169089	0.182959	0.126816
T.fulvipennis bidentatus	F	0.078	14.27	0.265592	0.53679	0.262789	0.171689	0.16398	0.167484	0.180799	0.131745
T.fulvipennis bidentatus	M	0.076	14.28	0.259804	0.539916	0.266807	0.172269	0.154762	0.168768	0.189076	0.136555
T.fulvipennis bidentatus	M	0.107	15.6	0.264744	0.539744	0.255128	0.167949	0.157051	0.157051	0.212179	0.146154
T.fulvipennis bidentatus	F	0.084	14.24	0.279494	0.536517	0.273174	0.176966	0.168539	0.15941	0.191011	0.135534
T.fulvipennis bidentatus	M	0.103	15.77	0.254914	0.54851	0.253012	0.169309	0.146481	0.170577	0.190869	0.134432
T.fulvipennis bidentatus	M	0.075	13.69	0.284149	0.530314	0.265888	0.177502	0.15851	0.169467	0.197224	0.141709
T.fulvipennis bidentatus	M	0.11	15.9	0.257233	0.533962	0.255975	0.174843	0.150314	0.169182	0.206289	0.146541
T.fulvipennis bidentatus	M	0.083	14.35	0.278049	0.54007	0.264111	0.183275	0.158188	0.169338	0.18676	0.132404
T.fulvipennis bidentatus	M	0.083	14.46	0.271784	0.53527	0.257953	0.170816	0.15491	0.16805	0.206086	0.14177
T.fulvipennis bidentatus	M	0.093	15.07	0.261447	0.544127	0.260783	0.172528	0.155275	0.167883	0.196417	0.132714
T.fulvipennis bidentatus	F	0.101	14.86	0.283311	0.524899	0.26716	0.179004	0.169583	0.166891	0.187079	0.138627
T.fulvipennis bidentatus	M	0.093	15.07	0.261447	0.544127	0.260783	0.172528	0.155275	0.167883	0.196417	0.132714
T.fulvipennis bidentatus	M	0.096	15.74	0.283355	0.550826	0.252224	0.171537	0.15756	0.159466	0.180432	0.132147
T.fulvipennis bidentatus	F	0.065	13.8	0.32029	0.553623	0.265942	0.175362	0.157246	0.162319	0.176812	0.126812
T.fulvipennis bidentatus	M	0.038	12.53	0.268156	0.525938	0.272945	0.184358	0.146049	0.185954	0.198723	0.142059
T.fulvipennis bidentatus	M	0.05	12.09	0.263854	0.531017	0.268817	0.188586	0.147229	0.179487	0.181969	0.142266
T.fulvipennis bidentatus	F	0.047	11.68	0.276541	0.539384	0.276541	0.180651	0.146404	0.17637	0.172089	0.137842
T.fulvipennis bidentatus	M	0.072	14.36	0.254178	0.544568	0.259053	0.169916	0.148329	0.167827	0.19429	0.139276
T.fulvipennis bidentatus	M	0.086	15.22	0.263469	0.51774	0.251643	0.180683	0.176084	0.166886	0.195138	0.13929
T.fulvipennis bidentatus	M	0.121	16.72	0.259569	0.534091	0.254187	0.173445	0.160287	0.169258	0.201555	0.136364
T.fulvipennis bidentatus	M	0.079	14.29	0.274318	0.540938	0.254024	0.174948	0.151854	0.16795	0.198041	0.139258
T.fulvipennis bidentatus	M	0.089	14.78	0.284844	0.541272	0.261164	0.18065	0.15088	0.173207	0.192152	0.134641
T.fulvipennis bidentatus	M	0.09	14.87	0.260928	0.529254	0.26698	0.173504	0.164761	0.167451	0.205111	0.138534
T.fulvipennis bidentatus	M	0.085	14.5	0.296552	0.532414	0.261379	0.175172	0.162069	0.170345	0.203448	0.135172
T.fulvipennis bidentatus	M	0.096	15.17	0.257086	0.534608	0.241266	0.178642	0.157548	0.172709	0.191167	0.135135
T.fulvipennis bidentatus	M	0.115	16.36	0.260391	0.526284	0.255501	0.174817	0.167482	0.165648	0.205379	0.140587
T.fulvipennis bidentatus	M	0.093	15.32	0.309399	0.531332	0.259791	0.184073	0.156005	0.178851	0.188642	0.133812
T.fulvipennis bidentatus	M	0.094	15.38	0.262679	0.535761	0.262679	0.177503	0.154746	0.172952	0.206112	0.136541
T.fulvipennis bidentatus	M	0.076	14.56	0.253434	0.51717	0.266484	0.17239	0.165522	0.175137	0.205357	0.14217
T.fulvipennis bidentatus	M	0.082	14.72	0.261549	0.528533	0.259511	0.181386	0.158967	0.168478	0.206522	0.144022
T.fulvipennis bidentatus	F	0.095	15.16	0.276385	0.519129	0.260554	0.170185	0.176121	0.166227	0.195251	0.138522
T.fulvipennis bidentatus	F	0.066	14.13	0.273885	0.53574	0.261854	0.167021	0.162067	0.159236	0.200991	0.142958
T.fulvipennis bidentatus	M	0.108	16.16	0.271658	0.527228	0.256807	0.171411	0.157178	0.170792	0.209158	0.144802
T.fulvipennis bidentatus	M	0.095	15.38	0.275033	0.53381	0.260728	0.173602	0.163849	0.1658	0.197659	0.136541
T.fulvipennis bidentatus	M	0.083	14.25	0.287719	0.53614	0.270877	0.185263	0.157895	0.172632	0.198596	0.133333
T.fulvipennis bidentatus	M	0.093	15.03	0.259481	0.523619	0.262142	0.171657	0.161677	0.168995	0.204923	0.145709
T.fulvipennis bidentatus	M	0.066	14.18	0.264457	0.516925	0.270099	0.172779	0.168547	0.172779	0.210155	0.141749
T.fulvipennis bidentatus	M	0.088	15.66	0.260536	0.516603	0.252235	0.171137	0.169221	0.170498	0.206897	0.143678
T.fulvipennis bidentatus	F	0.077	14.33	0.265178	0.509421	0.251221	0.172366	0.175855	0.166783	0.200977	0.147941
T.fulvipennis bidentatus	F	0.054	12.58	0.285374	0.526232	0.274245	0.174086	0.174086	0.168521	0.192369	0.131161
T.fulvipennis bidentatus	M	0.093	14.66	0.263302	0.514325	0.263984	0.178718	0.1603	0.175989	0.218281	0.149386
T.fulvipennis bidentatus	F	0.073	13.77	0.273784	0.519245	0.262164	0.16703	0.16703	0.169935	0.198257	0.143791
T.fulvipennis bidentatus	F	0.079	14.72	0.288723	0.526495	0.26087	0.169158	0.157609	0.169837	0.19837	0.14606
T.fulvipennis bidentatus	F	0.098	14.91	0.27163	0.529175	0.268276	0.17438	0.169685	0.168343	0.190476	0.132797
T.fulvipennis bidentatus	M	0.064	14.53	0.26841	0.530626	0.25671	0.170681	0.164487	0.16724	0.198211	0.137646
T.fulvipennis bidentatus	F	0.089	14.59	0.277587	0.536669	0.258396	0.169294	0.167238	0.163811	0.197395	0.132282
T.fulvipennis bidentatus	M	0.097	14.6	0.266438	0.526712	0.262329	0.181507	0.160274	0.168493	0.211644	0.144521
T.fulvipennis bidentatus	F	0.087	14.68	0.267711	0.525204	0.257493	0.173025	0.180518	0.159401	0.19346	0.134877
T.fulvipennis bidentatus	M	0.092	15.5	0.266452	0.524516	0.259355	0.174839	0.166452	0.167097	0.200645	0.141935
T.fulvipennis bidentatus	M	0.078	14.32	0.273045	0.51676	0.263268	0.170391	0.167598	0.171089	0.199022	0.144553
T.fulvipennis bidentatus	M	0.086	14.82	0.302969	0.533063	0.262483	0.174089	0.156545	0.170715	0.210526	0.139676
T.fulvipennis bidentatus	M	0.09	14.96	0.264037	0.52139	0.258021	0.17246	0.163102	0.171123	0.204545	0.144385
T.fulvipennis bidentatus	M	0.085	14.61	0.261465	0.522245	0.262834	0.177276	0.157426	0.174538	0.212183	0.145791
T.fulvipennis bidentatus	M	0.079	14.75	0.275932	0.532881	0.266441	0.175593	0.15661	0.171525	0.20678	0.138983
T.fulvipennis bidentatus	M	0.099	15.46	0.26132	0.518758	0.262613	0.175291	0.163648	0.176585	0.195343	0.141009
T.fulvipennis bidentatus	M	0.097	15.6	0.238462	0.555769	0.251923	0.171154	0.15	0.16859	0.188462	0.125641
T.fulvipennis bidentatus	M	0.093	15.09	0.260437	0.538767	0.262425	0.175613	0.157058	0.168986	0.194831	0.135189
T.fulvipennis bidentatus	M	0.08	14.17	0.259704	0.528582	0.251235	0.174312	0.169372	0.164432	0.195483	0.137615
T.fulvipennis bidentatus	M	0.088	14.91	0.263581	0.523139	0.254863	0.169014	0.172368	0.171026	0.196512	0.133467
T.fulvipennis bidentatus	M	0.084	14.35	0.252962	0.53101	0.264808	0.1777	0.169338	0.170732	0.201394	0.12892
T.fulvipennis bidentatus	F	0.105	15.43	0.271549	0.524303	0.265716	0.174984	0.168503	0.171095	0.199611	0.136099
T.fulvipennis bidentatus	F	0.089	14.36	0.273677	0.537604	0.259749	0.174791	0.168524	0.166435	0.183844	0.127437
T.fulvipennis bidentatus	M	0.095	15.37	0.218608	0.53676	0.260247	0.174366	0.15745	0.170462	0.201692	0.135329
T.fulvipennis bidentatus	F	0.086	14.63	0.276145	0.524265	0.264525	0.179084	0.168148	0.165414	0.20164	0.142174
T.fulvipennis bidentatus	M	0.097	14.95	0.264214	0.511706	0.259532	0.180602	0.172575	0.171237	0.210702	0.144482
T.fulvipennis bidentatus	F	0.081	14.34	0.256625	0.517434	0.246862	0.169456	0.174338	0.170153	0.205718	0.138075
T.fulvipennis bidentatus	M	0.096	15.07	0.264764	0.525547	0.260119	0.171201	0.16921	0.169874	0.199071	0.135368
T.fulvipennis bidentatus	M	0.097	14.84	0.264825	0.530997	0.254717	0.179245	0.16442	0.173181	0.196092	0.131402
T.fulvipennis bidentatus	M	0.079	14.05	0.26121	0.516014	0.255516	0.17153	0.159431	0.175801	0.2121	0.148754
T.fulvipennis bidentatus	M	0.071	13.83	0.258858	0.520607	0.253796	0.167751	0.159798	0.177151	0.205351	0.142444
T.fulvipennis bidentatus	F	0.082	14.81	0.269413	0.530047	0.268737	0.174882	0.159352	0.170155	0.201215	0.140446
T.fulvipennis bidentatus	F	0.067	13.7	0.293431	0.540146	0.265693	0.175182	0.166423	0.165693	0.194891	0.127737
T.fulvipennis bidentatus	M	0.093	15.22	0.263469	0.533509	0.252957	0.182654	0.158344	0.1682	0.214192	0.139947
T.fulvipennis bidentatus	M	0.094	15.35	0.261889	0.528339	0.259935	0.170684	0.16873	0.166775	0.183713	0.136156
T.fulvipennis bidentatus	F	0.099	15.41	0.268657	0.532122	0.256976	0.173264	0.160286	0.166126	0.195328	0.141467
T.fulvipennis bidentatus	M	0.114	16.3	0.262577	0.543558	0.255215	0.172393	0.151534	0.168712	0.196933	0.136196
T.fulvipennis bidentatus	M	0.089	15.04	0.271941	0.549202	0.263298	0.176197	0.146941	0.175532	0.189495	0.128324
T.fulvipennis bidentatus	M	0.091	14.69	0.262083	0.526889	0.255276	0.181756	0.174949	0.168822	0.189925	0.12934
T.fulvipennis bidentatus	F	0.085	14.84	0.27628	0.528976	0.266846	0.166442	0.16442	0.163073	0.198113	0.143531
T.fulvipennis bidentatus	M	0.094	15.19	0.257406	0.527321	0.254773	0.16919	0.16129	0.172482	0.20079	0.138907
T.fulvipennis bidentatus	F	0.103	15.04	0.264628	0.519282	0.267287	0.171543	0.172207	0.168883	0.202793	0.139628
T.fulvipennis bidentatus	M	0.108	16	0.309375	0.545	0.251875	0.178125	0.150625	0.171875	0.199375	0.1325
T.fulvipennis bidentatus	M	0.097	15.04	0.259973	0.518617	0.255319	0.175532	0.166223	0.174867	0.198803	0.140293
T.fulvipennis bidentatus	F	0.106	15.35	0.272964	0.534202	0.265147	0.169381	0.160912	0.166124	0.196743	0.138762
T.fulvipennis bidentatus	M	0.089	14.81	0.265361	0.52262	0.249831	0.175557	0.161377	0.16948	0.201215	0.146523
T.fulvipennis bidentatus	M	0.086	14.18	0.267983	0.524683	0.262341	0.180536	0.163611	0.173484	0.214386	0.138223
T.fulvipennis bidentatus	M	0.096	15.1	0.266887	0.529139	0.259603	0.172185	0.164238	0.169536	0.202649	0.137086
T.fulvipennis bidentatus	M	0.091	14.92	0.266756	0.532172	0.255362	0.176273	0.16622	0.172252	0.200402	0.129357
T.fulvipennis bidentatus	M	0.088	14.84	0.261456	0.523585	0.260108	0.177224	0.16442	0.179245	0.189353	0.132749
T.fulvipennis bidentatus	F	0.097	14.39	0.275191	0.533009	0.268242	0.172342	0.164003	0.169562	0.19458	0.133426
T.fulvipennis bidentatus	M	0.092	15.35	0.254072	0.532899	0.246906	0.162866	0.163518	0.16873	0.197394	0.134853
T.fulvipennis bidentatus	M	0.08	14.09	0.251242	0.542938	0.253371	0.163946	0.155429	0.168914	0.210078	0.132718
T.fulvipennis bidentatus	M	0.102	15.13	0.261071	0.525446	0.259088	0.18308	0.167217	0.177792	0.198282	0.129544
T.fulvipennis bidentatus	F	0.095	15.26	0.28637	0.524902	0.257536	0.17038	0.169725	0.168414	0.192661	0.136959
T.fulvipennis bidentatus	M	0.093	14.76	0.261518	0.525068	0.265583	0.178862	0.165312	0.172764	0.213415	0.136856
T.fulvipennis bidentatus	F	0.076	13.94	0.28264	0.539455	0.271879	0.17934	0.150646	0.170732	0.205882	0.139168
T.fulvipennis bidentatus	F	0.073	13.08	0.282875	0.552752	0.279817	0.180428	0.158257	0.174312	0.189602	0.114679
T.fulvipennis bidentatus	M	0.106	15	0.283333	0.536	0.265333	0.185333	0.161333	0.173333	0.176	0.129333
T.fulvipennis bidentatus	M	0.091	14.61	0.271047	0.526352	0.27447	0.182752	0.150582	0.177276	0.220397	0.145791
T.fulvipennis bidentatus	M	0.091	14.85	0.268013	0.531987	0.26734	0.179125	0.160943	0.172391	0.189899	0.13468
T.fulvipennis bidentatus	M	0.091	14.42	0.265603	0.535368	0.268377	0.176838	0.156033	0.17337	0.190014	0.135229
T.fulvipennis bidentatus	F	0.093	14.22	0.296765	0.546414	0.270042	0.178622	0.168776	0.171589	0.180028	0.113221
T.fulvipennis bidentatus	F	0.091	14.46	0.278008	0.541494	0.253804	0.178423	0.175657	0.165284	0.165975	0.117566
T.fulvipennis bidentatus	M	0.095	15.25	0.276721	0.54623	0.258361	0.175738	0.156066	0.17377	0.179016	0.123934
T.fulvipennis bidentatus	M	0.166	18.58	0.280409	0.545748	0.248116	0.16577	0.160926	0.162002	0.196986	0.131324
T.fulvipennis bidentatus	F	0.175	19.31	0.304505	0.532885	0.244433	0.166235	0.167271	0.158467	0.200932	0.141378
T.fulvipennis bidentatus	M	0.173	18.83	0.25863	0.518322	0.250664	0.175252	0.176845	0.1641	0.215082	0.140733
T.fulvipennis bidentatus	M	0.085	14.73	0.270876	0.540394	0.268839	0.175832	0.154107	0.170401	0.194162	0.135098
T.fulvipennis bidentatus	F	0.106	15.32	0.266319	0.539164	0.259138	0.174935	0.164491	0.16906	0.184726	0.127285
T.fulvipennis bidentatus	M	0.107	15.66	0.270115	0.544061	0.265006	0.174968	0.152618	0.16539	0.204342	0.137931
T.fulvipennis bidentatus	M	0.095	15.1	0.259603	0.528477	0.254305	0.177483	0.160927	0.166887	0.194702	0.143709
T.fulvipennis bidentatus	F	0.087	14.53	0.283551	0.533379	0.262216	0.173434	0.163799	0.168617	0.179628	0.134205
T.fulvipennis bidentatus	M	0.08	14.21	0.261787	0.520056	0.268121	0.178747	0.163969	0.173821	0.2076	0.142153
T.fulvipennis bidentatus	M	0.098	15.18	0.260211	0.529644	0.258893	0.184453	0.15415	0.176548	0.208827	0.139657
T.fulvipennis bidentatus	M	0.099	15.51	0.265635	0.521599	0.263056	0.180529	0.158607	0.171502	0.207608	0.148291
T.fulvipennis bidentatus	F	0.106	15	0.264667	0.523333	0.256	0.170667	0.159333	0.169333	0.196	0.148
T.fulvipennis bidentatus	M	0.052	13.77	0.264343	0.546841	0.261438	0.179375	0.151779	0.169208	0.177923	0.132171
T.fulvipennis bidentatus	M	0.093	15.14	0.258917	0.519815	0.249009	0.174373	0.165786	0.171731	0.204095	0.142668
T.fulvipennis bidentatus	F	0.081	13.8	0.281884	0.537681	0.272464	0.173188	0.16087	0.166667	0.18913	0.134783
T.fulvipennis bidentatus	M	0.09	14.7	0.258503	0.532653	0.261905	0.171429	0.155102	0.171429	0.208163	0.140816
T.fulvipennis bidentatus	F	0.09	16.06	0.267746	0.530511	0.262142	0.173724	0.165629	0.167497	0.191781	0.136364
T.fulvipennis bidentatus	M	0.102	15.81	0.263757	0.538267	0.252372	0.168248	0.154333	0.168248	0.199241	0.139152
T.fulvipennis bidentatus	F	0.1	14.95	0.282943	0.534448	0.26087	0.168562	0.155184	0.171237	0.197324	0.13913
T.fulvipennis bidentatus	M	0.09	15.64	0.278133	0.544757	0.249361	0.170716	0.153453	0.168159	0.190537	0.133632
T.fulvipennis bidentatus	M	0.111	15.85	0.264984	0.528707	0.256782	0.184227	0.156467	0.170978	0.210726	0.143849
T.fulvipennis bidentatus	M	0.085	15.69	0.270873	0.53601	0.253027	0.176546	0.154238	0.171447	0.201402	0.138305
T.fulvipennis bidentatus	M	0.11	16.15	0.259443	0.527554	0.25387	0.173994	0.157895	0.173375	0.200619	0.141176
T.fulvipennis bidentatus	M	0.073	14.12	0.264873	0.528329	0.266289	0.174221	0.165014	0.169263	0.194759	0.137394
T.fulvipennis bidentatus	M	0.108	16.01	0.261087	0.53529	0.257964	0.176765	0.153654	0.164272	0.20862	0.146783
T.fulvipennis bidentatus	F	0.111	15.73	0.294978	0.527654	0.254927	0.170375	0.169739	0.165289	0.193897	0.137317
T.fulvipennis bidentatus	M	0.099	15.47	0.259211	0.530705	0.248869	0.181642	0.161603	0.166128	0.204913	0.141564
T.fulvipennis bidentatus	M	0.087	14.47	0.263303	0.520387	0.266759	0.176918	0.160332	0.177609	0.211472	0.141672
T.fulvipennis bidentatus	M	0.089	15.11	0.259431	0.549305	0.256122	0.173395	0.146923	0.172071	0.201191	0.131701
T.fulvipennis bidentatus	M	0.062	14.2	0.272535	0.53662	0.259155	0.171831	0.159859	0.171831	0.192254	0.13169
T.fulvipennis bidentatus	F	0.069	14.53	0.274604	0.527873	0.261528	0.167928	0.162423	0.163799	0.198899	0.145905
T.fulvipennis bidentatus	F	0.093	14.79	0.269777	0.534145	0.269101	0.169033	0.165652	0.166329	0.194726	0.133874
T.fulvipennis bidentatus	M	0.087	14.88	0.280914	0.533602	0.266801	0.181452	0.162634	0.172715	0.191532	0.131048
T.fulvipennis bidentatus	F	0.059	13.96	0.275788	0.547278	0.26361	0.168338	0.162607	0.163324	0.183381	0.126791
T.fulvipennis bidentatus	M	0.086	14.57	0.271105	0.511325	0.26081	0.17639	0.164036	0.175017	0.209334	0.149623
T.fulvipennis bidentatus	M	0.096	15.34	0.280965	0.532595	0.256193	0.170795	0.153846	0.170795	0.213168	0.142764
T.fulvipennis bidentatus	M	0.101	15.94	0.263488	0.525721	0.258469	0.173777	0.15872	0.171895	0.202008	0.143664
T.fulvipennis bidentatus	M	0.083	14.42	0.260055	0.524965	0.253814	0.169903	0.158114	0.169903	0.204577	0.147018
T.fulvipennis bidentatus	M	0.083	14.65	0.265529	0.52901	0.25802	0.238225	0.162457	0.166553	0.199317	0.14198
T.fulvipennis bidentatus	F	0.099	14.73	0.272234	0.525458	0.265445	0.172437	0.175153	0.164291	0.177868	0.135098
T.fulvipennis bidentatus	M	0.088	15.37	0.266103	0.525699	0.262199	0.179571	0.170462	0.169161	0.20039	0.134678
T.fulvipennis bidentatus	M	0.085	14.65	0.274403	0.519454	0.266212	0.170648	0.169283	0.166553	0.199317	0.14471
T.fulvipennis bidentatus	M	0.106	15.91	0.263356	0.524827	0.256442	0.174104	0.158391	0.174104	0.196103	0.142678
T.fulvipennis bidentatus	M	0.113	15.91	0.266499	0.514771	0.260842	0.182904	0.167819	0.17159	0.20616	0.14582
T.fulvipennis bidentatus	F	0.089	14.85	0.298316	0.525926	0.265993	0.17037	0.167677	0.163636	0.19596	0.142761
T.fulvipennis bidentatus	M	0.109	15.59	0.264913	0.520205	0.262348	0.179602	0.164849	0.172547	0.205901	0.142399
T.fulvipennis bidentatus	M	0.107	15.79	0.263458	0.522483	0.261558	0.181127	0.158328	0.174794	0.18746	0.144395
T.fulvipennis bidentatus	M	0.066	14.58	0.26749	0.549383	0.201646	0.176955	0.144719	0.174211	0.187243	0.131687
T.fulvipennis bidentatus	M	0.071	14.31	0.269741	0.533892	0.26485	0.171209	0.167715	0.161426	0.204053	0.136967
T.fulvipennis bidentatus	M	0.115	16.36	0.287897	0.535452	0.257946	0.18154	0.154034	0.174817	0.182763	0.135697
T.fulvipennis bidentatus	M	0.09	15.45	0.275081	0.557929	0.253722	0.171521	0.15534	0.161812	0.179935	0.124919
T.fulvipennis bidentatus	F	0.084	14.88	0.272177	0.524194	0.266801	0.168011	0.165995	0.170027	0.188172	0.139785
T.fulvipennis bidentatus	M	0.092	15.03	0.276114	0.530938	0.254824	0.179641	0.163673	0.16833	0.202927	0.137059
T.fulvipennis bidentatus	M	0.086	14.51	0.263956	0.524466	0.262578	0.179187	0.161268	0.169538	0.217092	0.144728
T.fulvipennis bidentatus	M	0.104	15.94	0.25345	0.517566	0.254705	0.170013	0.171267	0.164366	0.207654	0.146801
T.fulvipennis bidentatus	M	0.079	14.37	0.256785	0.531663	0.258873	0.173974	0.165623	0.165623	0.201113	0.137091
T.fulvipennis bidentatus	M	0.089	14.88	0.254032	0.530242	0.261425	0.172715	0.161962	0.169355	0.209005	0.138441
T.fulvipennis bidentatus	M	0.073	13.61	0.263777	0.524614	0.273328	0.180749	0.164585	0.16385	0.209405	0.146951
T.fulvipennis bidentatus	M	0.075	14.1	0.265957	0.532624	0.265248	0.173759	0.169504	0.164539	0.2	0.133333
T.fulvipennis bidentatus	M	0.089	14.43	0.286209	0.529453	0.261261	0.178794	0.168399	0.168399	0.186417	0.133749
T.fulvipennis bidentatus	F	0.102	15.19	0.271231	0.539829	0.263989	0.168532	0.16524	0.167874	0.186307	0.127057
T.fulvipennis bidentatus	M	0.109	15.99	0.26329	0.531582	0.254534	0.17636	0.163852	0.171357	0.200125	0.133208
T.fulvipennis bidentatus	F	0.092	14.43	0.269577	0.52876	0.251559	0.167706	0.171864	0.163548	0.196812	0.135828
T.fulvipennis bidentatus	M	0.074	14.82	0.259109	0.531714	0.259784	0.173414	0.153846	0.165317	0.195007	0.149123
T.fulvipennis bidentatus	F	0.08	14.07	0.290689	0.540867	0.266525	0.169865	0.162758	0.163468	0.191187	0.132907
T.fulvipennis bidentatus	M	0.106	15.82	0.270544	0.535398	0.258534	0.178887	0.152339	0.170038	0.213021	0.142225
T.fulvipennis bidentatus	M	0.098	15.43	0.296824	0.534025	0.256643	0.17952	0.15943	0.173688	0.197667	0.132858
T.fulvipennis bidentatus	F	0.079	14.13	0.275301	0.537863	0.273956	0.163482	0.167021	0.164897	0.186129	0.130219
T.fulvipennis bidentatus	F	0.111	15.21	0.283366	0.517423	0.275477	0.190664	0.16831	0.17094	0.206443	0.143327
T.fulvipennis bidentatus	M	0.123	16.37	0.25901	0.535736	0.256567	0.175321	0.158216	0.172877	0.19609	0.13317
T.fulvipennis bidentatus	M	0.103	15.46	0.26132	0.534929	0.260673	0.170763	0.157827	0.166235	0.21022	0.141009
T.fulvipennis bidentatus	M	0.077	14.47	0.286109	0.539737	0.257775	0.175536	0.152039	0.175536	0.187975	0.132688
T.fulvipennis bidentatus	M	0.091	15.25	0.281967	0.537049	0.253115	0.172459	0.153443	0.172459	0.194754	0.137049
T.fulvipennis bidentatus	M	0.092	15.13	0.255122	0.510245	0.261071	0.170522	0.181097	0.165896	0.204891	0.142763
T.fulvipennis bidentatus	F	0.096	15.02	0.272969	0.513316	0.270972	0.172437	0.178429	0.176431	0.131158	0.131824
T.fulvipennis bidentatus	M	0.076	12.95	0.264865	0.525097	0.265637	0.173745	0.155212	0.170656	0.216988	0.149035
T.fulvipennis bidentatus	M	0.055	12.46	0.275281	0.545746	0.276083	0.180578	0.161316	0.177368	0.185393	0.11557
T.fulvipennis bidentatus	F	0.084	13.93	0.282125	0.534099	0.264896	0.169419	0.163676	0.163676	0.198851	0.13855
T.fulvipennis bidentatus	M	0.108	16	0.243125	0.5475	0.25625	0.175	0.145625	0.174375	0.17375	0.1325
T.fulvipennis bidentatus	M	0.082	14.87	0.268998	0.550101	0.263618	0.170814	0.149294	0.166106	0.199731	0.134499
T.fulvipennis bidentatus	F	0.097	15.16	0.266491	0.521108	0.261873	0.171504	0.180079	0.166227	0.183377	0.132586
T.fulvipennis bidentatus	M	0.11	16.09	0.257303	0.52082	0.252952	0.171535	0.170914	0.164699	0.206339	0.143567
T.fulvipennis bidentatus	M	0.101	15.31	0.256042	0.529066	0.247551	0.165905	0.163945	0.161332	0.201829	0.145656
T.fulvipennis bidentatus	F	0.099	15.76	0.283629	0.541244	0.251904	0.159898	0.160533	0.159264	0.196701	0.138959
T.fulvipennis bidentatus	M	0.094	15.18	0.258893	0.525033	0.256917	0.168643	0.162714	0.169302	0.20224	0.142951
T.fulvipennis bidentatus	M	0.082	14.9	0.257047	0.525503	0.262416	0.177181	0.169799	0.178523	0.203356	0.126174
T.fulvipennis bidentatus	M	0.102	15.67	0.280791	0.548181	0.25016	0.174856	0.148692	0.169113	0.199107	0.134014
T.fulvipennis bidentatus	M	0.092	15.4	0.244805	0.505844	0.255195	0.167532	0.201299	0.171429	0.198701	0.121429
T.fulvipennis bidentatus	M	0.107	16.01	0.264834	0.509681	0.262336	0.169894	0.198626	0.166146	0.19238	0.125547
T.fulvipennis bidentatus	F	0.066	14.46	0.278008	0.541494	0.253804	0.178423	0.175657	0.165284	0.165975	0.117566
T.fulvipennis bidentatus	M	0.088	15.04	0.263963	0.531915	0.25266	0.166888	0.169548	0.166223	0.201463	0.132314
T.fulvipennis bidentatus	M	0.121	16.85	0.274184	0.531751	0.256973	0.170326	0.159644	0.169733	0.214243	0.138872
T.fulvipennis bidentatus	M	0.101	15.89	0.264317	0.524229	0.262429	0.169918	0.166142	0.167401	0.210195	0.142228
T.fulvipennis bidentatus	M	0.124	16.98	0.265018	0.523557	0.248528	0.1702	0.158422	0.171967	0.193168	0.146054
T.fulvipennis bidentatus	M	0.113	16.29	0.274401	0.543892	0.255985	0.170043	0.154082	0.165132	0.208103	0.136894
T.fulvipennis bidentatus	M	0.114	16.71	0.246559	0.526032	0.259725	0.168761	0.172352	0.162777	0.220826	0.138839
T.fulvipennis bidentatus	M	0.148	17.74	0.239572	0.519729	0.254791	0.172492	0.173055	0.166291	0.202368	0.140924
T.fulvipennis bidentatus	M	0.1	15.2	0.256579	0.526316	0.275	0.173684	0.167763	0.164474	0.222368	0.141447
T.fulvipennis bidentatus	M	0.076	15.4	0.261039	0.526623	0.268831	0.17013	0.167532	0.17013	0.213636	0.135714
T.fulvipennis bidentatus	M	0.117	16.11	0.266294	0.521415	0.270019	0.182495	0.164494	0.16946	0.224705	0.144631
T.fulvipennis bidentatus	M	0.126	16.85	0.259347	0.527596	0.261721	0.168546	0.166172	0.1727	0.20178	0.133531
T.fulvipennis bidentatus	M	0.091	15.37	0.256994	0.521145	0.264802	0.176318	0.167209	0.169811	0.212752	0.141835
T.fulvipennis bidentatus	F	0.157	17.7	0.274576	0.527684	0.264407	0.171751	0.174576	0.164972	0.19435	0.132768
T.fulvipennis bidentatus	M	0.1	15.61	0.256246	0.513133	0.256887	0.162716	0.174247	0.176169	0.214606	0.136451
T.fulvipennis bidentatus	M	0.152	17.72	0.259594	0.522573	0.259029	0.176072	0.171558	0.168736	0.202596	0.137133
T.fulvipennis bidentatus	M	0.127	16.91	0.258427	0.519219	0.262567	0.179775	0.175636	0.168539	0.219988	0.136606
T.fulvipennis bidentatus	F	0.147	17.63	0.313103	0.528644	0.258083	0.161656	0.167896	0.163925	0.207033	0.139535
T.fulvipennis bidentatus	M	0.134	17.4	0.252299	0.525862	0.262644	0.170115	0.168391	0.165517	0.213793	0.14023
T.fulvipennis bidentatus	M	0.123	16.84	0.250594	0.523753	0.254157	0.171615	0.165083	0.166271	0.205463	0.144893
T.fulvipennis bidentatus	M	0.11	16.15	0.254489	0.504644	0.264396	0.175232	0.180805	0.16161	0.211765	0.152941
T.fulvipennis bidentatus	M	0.097	15.3	0.254902	0.517647	0.262092	0.175163	0.170588	0.169935	0.216993	0.14183
T.fulvipennis bidentatus	M	0.115	16.18	0.260198	0.524104	0.267614	0.178616	0.173053	0.166873	0.203956	0.13597
T.fulvipennis bidentatus	M	0.111	16.11	0.246431	0.515829	0.263811	0.172564	0.176909	0.173184	0.213532	0.134078
T.fulvipennis bidentatus	F	0.137	17.24	0.270302	0.518561	0.258121	0.168794	0.173434	0.172274	0.191995	0.135731
T.fulvipennis bidentatus	F	0.129	16.83	0.278669	0.518717	0.256684	0.172906	0.175876	0.158645	0.202614	0.146762
T.fulvipennis bidentatus	M	0.127	17.21	0.256827	0.521209	0.261476	0.177223	0.171993	0.172574	0.212667	0.134224
T.fulvipennis bidentatus	M	0.098	15.86	0.253468	0.520177	0.261034	0.165826	0.17024	0.171501	0.208701	0.138083
T.fulvipennis bidentatus	F	0.112	16.42	0.262485	0.514007	0.256395	0.165652	0.186967	0.160171	0.200365	0.138855
T.fulvipennis bidentatus	F	0.14	17.55	0.267806	0.526496	0.258689	0.169231	0.176068	0.161823	0.194872	0.135613
T.fulvipennis bidentatus	M	0.086	15.62	0.265685	0.519846	0.258003	0.161972	0.172855	0.164533	0.208067	0.142766
T.fulvipennis bidentatus	M	0.115	16.58	0.289505	0.527141	0.263571	0.179131	0.176719	0.162847	0.196622	0.133293
T.fulvipennis bidentatus	M	0.146	18.21	0.254805	0.512905	0.25151	0.169687	0.181219	0.163646	0.208127	0.14223
T.fulvipennis bidentatus	M	0.119	16.4	0.257317	0.52378	0.267683	0.172561	0.17439	0.162195	0.211585	0.139634
T.fulvipennis bidentatus	F	0.104	16.86	0.273428	0.523725	0.260973	0.166667	0.174377	0.156584	0.19573	0.145314
T.fulvipennis bidentatus	M	0.105	15.83	0.281112	0.524953	0.264687	0.172457	0.170562	0.172457	0.207202	0.132028
T.fulvipennis bidentatus	M	0.142	17.25	0.269565	0.521739	0.256232	0.176812	0.169275	0.167536	0.211594	0.141449
T.fulvipennis bidentatus	M	0.146	17.62	0.253689	0.510783	0.259364	0.182179	0.184449	0.162316	0.207151	0.142452
T.fulvipennis bidentatus	M	0.119	16.41	0.260207	0.527727	0.262645	0.166362	0.163315	0.161487	0.201706	0.147471
T. coracinus	M	0.153	17.27	0.268095	0.520556	0.259988	0.177765	0.172554	0.173712	0.203822	0.133179
T. coracinus	M	0.167	18.39	0.294725	0.53888	0.249048	0.166939	0.16422	0.165307	0.197934	0.131593
T. coracinus	M	0.178	18.43	0.269669	0.53337	0.251221	0.17363	0.153554	0.167661	0.209441	0.145415
T. coracinus	M	0.147	17.96	0.273942	0.573497	0.241091	0.153118	0.146993	0.157016	0.167595	0.122494
T. coracinus	M	0.158	19.01	0.263019	0.581273	0.226723	0.151499	0.141504	0.154129	0.177801	0.123093
T. coracinus	F	0.101	17.92	0.287388	0.579799	0.233817	0.149554	0.141741	0.15346	0.165737	0.125
T. coracinus	F	0.157	18.45	0.283469	0.590244	0.22981	0.153388	0.144715	0.148509	0.158808	0.116531
T. coracinus	M	0.12	17.09	0.266238	0.582212	0.242247	0.155061	0.139848	0.160913	0.166764	0.117028
T. coracinus	M	0.156	19.07	0.256424	0.541164	0.241217	0.156266	0.167803	0.159413	0.19612	0.13162
T. coracinus	F	0.157	19.29	0.269051	0.553136	0.242094	0.157076	0.163815	0.158631	0.178849	0.124417
T. coracinus	M	0.193	19.04	0.254202	0.565651	0.254202	0.158613	0.168067	0.139181	0.191702	0.127101
T. coracinus	M	0.203	19.33	0.265908	0.531816	0.247025	0.169167	0.159338	0.174858	0.214175	0.133989
T. coracinus	M	0.163	18.8	0.265426	0.545745	0.248936	0.157979	0.15266	0.17234	0.17766	0.129255
T. coracinus	M	0.173	19.27	0.262065	0.54904	0.233524	0.16191	0.15672	0.170732	0.189414	0.123508
T. coracinus	M	0.157	18.33	0.270595	0.54719	0.230224	0.162575	0.159302	0.168031	0.184943	0.125477
T. coracinus	M	0.103	16.02	0.260924	0.557428	0.254057	0.163546	0.160424	0.16417	0.184769	0.117978
T. coracinus	F	0.141	18.35	0.284469	0.561308	0.243052	0.154223	0.155858	0.155313	0.182016	0.12752
T. coracinus	M	0.152	18.25	0.263014	0.547397	0.250959	0.160548	0.145205	0.171507	0.193973	0.13589
T. coracinus	M	0.158	19.26	0.262721	0.545691	0.240395	0.162513	0.155244	0.161475	0.206646	0.137591
T. coracinus	M	0.149	18.79	0.273018	0.548164	0.24215	0.151676	0.160192	0.160724	0.192123	0.130921
T. coracinus	F	0.146	18.17	0.26087	0.548707	0.241607	0.155751	0.160704	0.156852	0.189873	0.133737
T. coracinus	M	0.127	17.98	0.269188	0.550056	0.250278	0.16129	0.152948	0.164627	0.194661	0.132369
T. coracinus	M	0.079	15.04	0.276596	0.578457	0.259309	0.162899	0.139628	0.163564	0.172872	0.118351
T. coracinus	M	0.137	18	0.261111	0.533889	0.238889	0.161111	0.159444	0.166667	0.203889	0.14
T. coracinus	M	0.147	17.55	0.273504	0.545299	0.239316	0.158405	0.159544	0.160684	0.206838	0.134473
T. coracinus	F	0.162	18.03	0.301719	0.582917	0.246256	0.160843	0.140876	0.161398	0.151414	0.114809
T. coracinus	F	0.164	18.56	0.270474	0.559806	0.246228	0.154634	0.166487	0.15625	0.170797	0.117457
T. coracinus	F	0.18	18.46	0.280607	0.552004	0.242687	0.170639	0.15493	0.169014	0.198267	0.124052
T. coracinus	F	0.165	18.53	0.281705	0.538586	0.253103	0.1619	0.166757	0.169455	0.17755	0.125202
T. coracinus	M	0.142	17.85	0.257143	0.547339	0.244818	0.164706	0.151821	0.165826	0.19944	0.135014
T. coracinus	M	0.092	17.21	0.26903	0.542708	0.244044	0.158629	0.162696	0.160372	0.19233	0.134224
T. coracinus	M	0.135	18.05	0.288089	0.534626	0.243767	0.159557	0.160665	0.165651	0.199446	0.139058
T. coracinus	M	0.14	18.39	0.249592	0.533442	0.23926	0.150625	0.179445	0.159326	0.191408	0.127787
T. coracinus	M	0.149	18.47	0.258257	0.537087	0.243638	0.158094	0.167298	0.159718	0.195994	0.135896
T. coracinus	M	0.143	18.12	0.251104	0.543598	0.24117	0.153974	0.166115	0.162804	0.192605	0.127483
T. coracinus	F	0.146	17.82	0.271605	0.546016	0.24523	0.159933	0.167789	0.1633	0.182941	0.122896
T. coracinus	M	0.136	17.16	0.27331	0.544872	0.254079	0.171911	0.164336	0.164918	0.19289	0.125874
T. coracinus	F	0.123	16.7	0.282036	0.551497	0.249701	0.162874	0.155689	0.158683	0.200599	0.134132
T. coracinus	M	0.155	18.09	0.271973	0.557767	0.246545	0.164179	0.147595	0.162521	0.197899	0.132117
T. coracinus	F	0.144	17.08	0.285129	0.553279	0.247658	0.161007	0.151054	0.16452	0.187939	0.131148
T. coracinus	M	0.159	18.73	0.266951	0.560598	0.237587	0.161239	0.145755	0.164976	0.200214	0.128671
T. coracinus	M	0.116	16.77	0.280262	0.55158	0.253429	0.159809	0.166965	0.162194	0.187835	0.119261
T. coracinus	M	0.159	18.15	0.269421	0.54876	0.240771	0.16584	0.153168	0.175758	0.190083	0.122314
T. coracinus	F	0.122	17.24	0.266821	0.541183	0.24826	0.153132	0.172274	0.153712	0.191415	0.132831
T. coracinus	F	0.129	16.87	0.270302	0.545347	0.24837	0.157676	0.17131	0.158862	0.169532	0.124481
T. coracinus	M	0.098	15.81	0.261227	0.545857	0.246679	0.159393	0.158128	0.169513	0.199873	0.126502
T. coracinus	F	0.131	16.66	0.280312	0.541417	0.256903	0.163866	0.151861	0.17467	0.190276	0.132053
T. coracinus	M	0.108	16.33	0.273729	0.558481	0.241274	0.153705	0.155542	0.162278	0.184323	0.123699
T. coracinus	F	0.143	17.61	0.272572	0.541738	0.248154	0.159568	0.160136	0.163543	0.191369	0.134583
T. coracinus	M	0.13	17.45	0.253295	0.541547	0.246991	0.166762	0.160458	0.165043	0.183381	0.132951
T. coracinus	M	0.13	16.84	0.27019	0.549881	0.245843	0.165083	0.165677	0.163302	0.198931	0.12114
T. coracinus	F	0.142	17.16	0.276224	0.547203	0.257576	0.16317	0.15676	0.162005	0.188811	0.134033
T. coracinus	M	0.145	18.44	0.271692	0.547722	0.246746	0.16757	0.159436	0.163774	0.191974	0.129067
T. coracinus	M	0.135	18	0.270556	0.553333	0.244444	0.164444	0.156111	0.163333	0.202778	0.127222
T. coracinus	M	0.136	17.84	0.261771	0.54148	0.249439	0.164238	0.159193	0.165359	0.190583	0.133969
T. coracinus	F	0.139	18.44	0.284165	0.557484	0.251627	0.16269	0.159978	0.152928	0.177874	0.12961
T. coracinus	F	0.104	16.71	0.27289	0.557151	0.248354	0.163375	0.151406	0.160981	0.173549	0.130461
T. coracinus	F	0.134	17.68	0.276018	0.555995	0.252828	0.15724	0.164027	0.160633	0.191742	0.119344
T. coracinus	F	0.151	18.53	0.275769	0.558554	0.240151	0.159201	0.1619	0.157582	0.17755	0.121964
T. coracinus	M	0.15	18.14	0.288864	0.562845	0.250276	0.162624	0.151047	0.164829	0.18688	0.121279
T. coracinus	F	0.136	17.75	0.276056	0.534085	0.256901	0.15831	0.167887	0.16338	0.188732	0.134648
T. coracinus	F	0.146	16.99	0.282519	0.553267	0.247204	0.161271	0.162448	0.16598	0.193055	0.118305
T. coracinus	F	0.132	17.41	0.275704	0.542217	0.248133	0.157955	0.161976	0.170592	0.174612	0.125215
T. coracinus	M	0.154	18.08	0.269358	0.538717	0.253872	0.173119	0.158186	0.178097	0.201327	0.125
T. coracinus	F	0.112	16.44	0.271898	0.540754	0.250608	0.158151	0.164842	0.161192	0.18309	0.133212
T. coracinus	M	0.122	16.16	0.284653	0.548267	0.257426	0.177599	0.152228	0.168317	0.199257	0.131188
T. coracinus	M	0.137	16.81	0.277216	0.547293	0.259369	0.168947	0.150506	0.167757	0.199881	0.134444
T. coracinus	F	0.136	17.35	0.272622	0.559078	0.239193	0.157925	0.160231	0.16196	0.183285	0.118732
T. coracinus	M	0.172	19.13	0.259801	0.549399	0.223732	0.163095	0.159958	0.158913	0.198641	0.13173
T. coracinus	M	0.135	16.95	0.269617	0.536873	0.246608	0.168142	0.157522	0.173451	0.189381	0.132153
T. coracinus	M	0.115	17.01	0.279248	0.56261	0.255144	0.16167	0.148736	0.166961	0.203998	0.121693
T. coracinus	F	0.148	17.56	0.273918	0.555239	0.248861	0.160023	0.145216	0.164579	0.175399	0.134966
T. coracinus	M	0.14	17.27	0.277939	0.559931	0.24725	0.171395	0.152866	0.163289	0.182976	0.123914
T. coracinus	M	0.146	18.2	0.269231	0.535165	0.244505	0.162088	0.165934	0.159341	0.214286	0.13956
T. coracinus	M	0.133	17.07	0.26655	0.54423	0.253661	0.17106	0.155829	0.174575	0.193907	0.125366
T. coracinus	M	0.093	16.88	0.258886	0.526659	0.239336	0.157583	0.180687	0.162322	0.193128	0.130332
T. coracinus	M	0.134	17.43	0.26047	0.534137	0.250143	0.165806	0.166954	0.167527	0.197935	0.131383
T. coracinus	F	0.171	18.04	0.28714	0.554324	0.248337	0.162971	0.160754	0.163525	0.194568	0.121397
T. coracinus	M	0.115	16.45	0.269301	0.550152	0.255319	0.168389	0.158663	0.166565	0.187842	0.12462
T. coracinus	M	0.13	17.14	0.268961	0.536756	0.244457	0.170362	0.163944	0.173279	0.174446	0.126021
T. coracinus	F	0.136	16.86	0.300119	0.569395	0.25089	0.164294	0.142349	0.158956	0.198102	0.1293
T. coracinus	F	0.139	17.79	0.290613	0.551996	0.252389	0.159078	0.15683	0.160764	0.178752	0.13041
T. coracinus	F	0.155	17.99	0.275153	0.54975	0.249583	0.17065	0.15731	0.171206	0.197332	0.121734
T. coracinus	F	0.141	17.14	0.289965	0.546674	0.246791	0.158693	0.165694	0.162777	0.187865	0.124854
T. coracinus	F	0.149	17.36	0.296659	0.552419	0.258641	0.166475	0.159562	0.161866	0.192396	0.126152
T. coracinus	M	0.138	17.66	0.260476	0.543601	0.237259	0.163647	0.15855	0.16761	0.203851	0.130238
T. coracinus	M	0.126	16.89	0.273535	0.55003	0.248668	0.159266	0.150385	0.168147	0.203079	0.131439
T. coracinus	M	0.124	17.59	0.26606	0.555998	0.242183	0.162592	0.154633	0.158044	0.190449	0.131325
T. coracinus	F	0.112	17.15	0.274052	0.54344	0.244898	0.157434	0.156851	0.166181	0.196501	0.133528
T. coracinus	M	0.145	17.45	0.270487	0.546705	0.253295	0.165616	0.167908	0.166762	0.191404	0.118625
T. coracinus	F	0.178	18.61	0.275658	0.551854	0.238581	0.170876	0.158517	0.165502	0.193444	0.124127
T. coracinus	M	0.115	17.3	0.284393	0.560116	0.252601	0.164162	0.145087	0.16185	0.208092	0.132948
T. coracinus	F	0.136	17.01	0.283951	0.54321	0.259259	0.169312	0.160494	0.166373	0.191652	0.129924
T. coracinus	F	0.117	15.72	0.290712	0.55598	0.256361	0.166031	0.153308	0.162214	0.194656	0.128499
T. coracinus	M	0.099	16.88	0.266588	0.541469	0.248223	0.167062	0.156398	0.1641	0.190758	0.138033
T. coracinus	M	0.08	14.51	0.262578	0.534804	0.255686	0.164714	0.15989	0.166092	0.199862	0.139214
T. coracinus	F	0.115	16.68	0.278777	0.543165	0.251199	0.161871	0.161871	0.160671	0.18705	0.134293
T. coracinus	M	0.103	17.15	0.266472	0.545773	0.243149	0.165598	0.153353	0.165015	0.19242	0.13586
T. coracinus	F	0.11	16.26	0.287208	0.546125	0.253383	0.164822	0.159287	0.162362	0.191267	0.132226
T. coracinus	M	0.083	16.02	0.276529	0.513109	0.244694	0.171036	0.194757	0.16417	0.187266	0.127965
T. coracinus	F	0.105	16.85	0.261128	0.537685	0.248665	0.161424	0.165579	0.158457	0.188724	0.138279
T. coracinus	M	0.108	16.43	0.26476	0.535606	0.244674	0.171029	0.1479	0.171637	0.205721	0.144857
T. coracinus	M	0.093	15.33	0.322896	0.553816	0.258317	0.166341	0.154599	0.161122	0.183953	0.130463
T. coracinus	M	0.114	16.5	0.286667	0.559394	0.256364	0.170909	0.153333	0.167879	0.175152	0.119394
T. coracinus	M	0.059	14.14	0.285007	0.570721	0.274399	0.17256	0.132956	0.161952	0.18529	0.134371
T. coracinus	M	0.104	15.88	0.287154	0.547229	0.263854	0.170655	0.15806	0.168136	0.187028	0.126574
T. coracinus	F	0.081	14.7	0.281633	0.563265	0.257823	0.154422	0.159184	0.152381	0.17619	0.12517
T. coracinus	F	0.095	15.77	0.288523	0.555485	0.254914	0.159163	0.159163	0.159163	0.169943	0.126189
T. coracinus	F	0.103	15.69	0.298917	0.557043	0.253665	0.165073	0.145953	0.164436	0.185468	0.132569
T. coracinus	M	0.094	15.14	0.286658	0.566711	0.262219	0.168428	0.145971	0.169749	0.175694	0.117569
T. coracinus	F	0.091	15.72	0.274809	0.548346	0.257634	0.161578	0.185115	0.15458	0.17112	0.111959
T. coracinus	M	0.111	16.08	0.281716	0.556592	0.257463	0.174751	0.156095	0.16791	0.175995	0.119403
T. coracinus	F	0.081	14.46	0.289073	0.567082	0.26556	0.1639	0.148686	0.163209	0.182573	0.121024
T. coracinus	M	0.083	14.48	0.276934	0.555249	0.258287	0.169199	0.153315	0.16989	0.169199	0.121547
T. coracinus	F	0.092	15.57	0.290944	0.565189	0.253693	0.165061	0.149647	0.159281	0.183687	0.125883
T. coracinus	F	0.097	15.29	0.296272	0.566383	0.264225	0.172008	0.149771	0.160889	0.182472	0.122956
T. coracinus	F	0.096	15.13	0.29544	0.565763	0.262393	0.165896	0.145406	0.159947	0.179775	0.128883
T. coracinus	M	0.087	14.87	0.284465	0.564896	0.258238	0.167451	0.154674	0.163416	0.177539	0.117014
T. coracinus	F	0.099	15.07	0.290644	0.568679	0.264764	0.171865	0.156603	0.158593	0.183809	0.116125
T. coracinus	M	0.105	15.53	0.290406	0.558274	0.259498	0.168706	0.147457	0.167418	0.189311	0.126851
T. coracinus	F	0.108	16.4	0.290854	0.55	0.260976	0.164024	0.158537	0.160366	0.163415	0.131098
T. coracinus	M	0.094	15.55	0.301608	0.567203	0.270096	0.180064	0.142765	0.172347	0.181994	0.117685
T. coracinus	F	0.108	15.26	0.307995	0.569463	0.268021	0.173001	0.140236	0.164482	0.186107	0.125819
T. coracinus	F	0.102	15.82	0.294564	0.558786	0.264855	0.16182	0.150442	0.154235	0.176991	0.136536
T. coracinus	M	0.079	14.38	0.292768	0.572323	0.265647	0.171766	0.145341	0.166203	0.180111	0.116134
T. coracinus	M	0.098	15.42	0.317121	0.568742	0.256161	0.166018	0.142672	0.166018	0.180934	0.122568
T. coracinus	M	0.113	16.3	0.286503	0.560123	0.258896	0.168712	0.155828	0.163804	0.181595	0.120245
T. coracinus	F	0.089	15.01	0.281146	0.562958	0.258494	0.162558	0.151899	0.155896	0.175883	0.129247
T. coracinus	M	0.127	16.34	0.293758	0.559364	0.26071	0.170747	0.155447	0.161567	0.194002	0.123623
T. coracinus	M	0.089	14.91	0.276325	0.562039	0.257545	0.16499	0.150235	0.162307	0.164319	0.125419
T. coracinus	F	0.105	15.96	0.296992	0.561404	0.269424	0.159774	0.154762	0.157895	0.177318	0.12594
T. coracinus	M	0.088	15.45	0.280906	0.553398	0.2589	0.159223	0.157929	0.159223	0.174757	0.12945
T. coracinus	F	0.098	15.51	0.288846	0.558994	0.261767	0.157963	0.149581	0.163121	0.175371	0.128304
T. coracinus	M	0.11	16.29	0.285451	0.548803	0.259669	0.168815	0.151013	0.171271	0.176182	0.128913
T. coracinus	F	0.099	15.67	0.291002	0.562859	0.261008	0.15635	0.147415	0.165284	0.169113	0.124442
T. coracinus	F	0.086	14.3	0.292308	0.565734	0.265734	0.162937	0.142657	0.167133	0.176224	0.124476
T. coracinus	F	0.102	15.03	0.319361	0.57352	0.268796	0.174983	0.141051	0.159015	0.179641	0.126414
T. coracinus	M	0.105	16.38	0.283272	0.541514	0.247253	0.15812	0.163004	0.161172	0.195971	0.13431
T. coracinus	M	0.137	17.31	0.261698	0.533795	0.244367	0.169266	0.162912	0.169266	0.209128	0.134027
T. coracinus	M	0.102	15.63	0.28087	0.552143	0.25016	0.168906	0.162508	0.168906	0.175304	0.116443
T. coracinus	M	0.123	17.18	0.263679	0.538999	0.249127	0.167637	0.161234	0.16298	0.204889	0.136787
T. coracinus	F	0.106	15.74	0.294155	0.554638	0.263659	0.171537	0.15756	0.16709	0.178526	0.120712
T. coracinus	F	0.092	15.5	0.28129	0.551613	0.25871	0.16129	0.16	0.16	0.179355	0.128387
T. coracinus	M	0.099	16.09	0.272219	0.545681	0.249223	0.154755	0.159727	0.169671	0.176507	0.124922
T. coracinus	M	0.108	16.24	0.270936	0.552956	0.256773	0.165025	0.152709	0.164409	0.176108	0.129926
T. coracinus	F	0.103	15.55	0.313826	0.545338	0.254662	0.161415	0.153055	0.15627	0.186495	0.145338
T. coracinus	F	0.088	14.85	0.284175	0.556902	0.2633	0.163636	0.150168	0.16431	0.178451	0.12862
T. coracinus	F	0.094	15.43	0.284511	0.548931	0.262476	0.160078	0.160078	0.156837	0.183409	0.134154
T. coracinus	F	0.092	15.16	0.288918	0.556728	0.260554	0.164908	0.157652	0.167546	0.163588	0.118074
T. coracinus	M	0.06	14.07	0.285004	0.562189	0.267235	0.171286	0.15565	0.168443	0.171286	0.113717
T. coracinus	F	0.085	15.17	0.277521	0.551747	0.263019	0.154911	0.151615	0.172709	0.173368	0.123929
T. coracinus	M	0.058	14.75	0.270508	0.546441	0.262373	0.161356	0.158644	0.166102	0.174237	0.128814
T. coracinus	M	0.106	15.75	0.274921	0.544762	0.254603	0.166349	0.158095	0.170159	0.180952	0.126984
T. coracinus	M	0.09	15.63	0.267434	0.554702	0.25016	0.15675	0.15483	0.166347	0.183621	0.12412
T. coracinus	M	0.099	15.79	0.271691	0.559215	0.258391	0.160228	0.157695	0.164661	0.167194	0.118429
T. coracinus	M	0.102	16.08	0.268035	0.544776	0.251866	0.162935	0.158582	0.165423	0.180348	0.131219
T. coracinus	M	0.115	16.3	0.282822	0.54908	0.26319	0.169939	0.154601	0.161963	0.182209	0.134356
T. coracinus	M	0.091	16.53	0.279492	0.53539	0.243799	0.153055	0.136721	0.155475	0.162129	0.172414
T. coracinus	M	0.096	15.75	0.274921	0.559365	0.255873	0.155556	0.146667	0.161905	0.182222	0.132063
T. coracinus	F	0.084	14.72	0.281929	0.565217	0.252717	0.161685	0.150136	0.163723	0.178668	0.120924
T. coracinus	F	0.095	15.32	0.279373	0.549608	0.265666	0.160574	0.149478	0.165144	0.173629	0.13577
T. coracinus	M	0.104	16.11	0.272502	0.554314	0.252017	0.168218	0.150217	0.165115	0.18622	0.130354
T. coracinus	M	0.1	15.84	0.27399	0.557449	0.258207	0.165404	0.152778	0.169192	0.173611	0.120581
T. coracinus	F	0.107	15.58	0.293967	0.56932	0.267651	0.168806	0.140565	0.155969	0.182927	0.134146
T. coracinus	F	0.079	14.59	0.2817	0.56477	0.267306	0.157642	0.15353	0.159013	0.17135	0.122687
T. coracinus	M	0.117	16.4	0.27622	0.559756	0.24939	0.167073	0.15061	0.160976	0.179878	0.128659
T. coracinus	M	0.103	15.6	0.274359	0.551282	0.260256	0.166667	0.148077	0.167308	0.185897	0.133333
T. coracinus	M	0.124	16.88	0.280213	0.552133	0.255332	0.166469	0.16173	0.159953	0.17891	0.126185
T. coracinus	F	0.091	15.09	0.316103	0.565938	0.26839	0.160371	0.149768	0.161034	0.172962	0.12326
T. coracinus	M	0.083	15.19	0.296906	0.557604	0.25214	0.162607	0.148782	0.163924	0.177749	0.129691
T. coracinus	F	0.097	15.21	0.289283	0.550953	0.267587	0.161736	0.16568	0.159763	0.16831	0.123603
T. coracinus	F	0.091	15.08	0.280504	0.557029	0.262599	0.157162	0.157162	0.155836	0.176393	0.129973
T. coracinus	M	0.087	15.19	0.281106	0.558262	0.252798	0.166557	0.152074	0.163265	0.180382	0.126399
T. coracinus	F	0.107	15.68	0.292092	0.558673	0.260204	0.165816	0.152423	0.163265	0.184949	0.125638
T. coracinus	M	0.111	16.37	0.285889	0.551008	0.252902	0.171655	0.155773	0.164325	0.171655	0.128894
T. coracinus	F	0.108	15.55	0.289389	0.555627	0.264952	0.168489	0.158199	0.162058	0.177492	0.124116
T. coracinus	M	0.104	15.27	0.296005	0.577603	0.258677	0.170268	0.153242	0.16372	0.169614	0.105435
T. coracinus	F	0.111	15.48	0.295866	0.563953	0.26292	0.166021	0.152455	0.161499	0.167959	0.122093
T. coracinus	F	0.088	15.78	0.304816	0.557668	0.261724	0.175539	0.162231	0.162864	0.17744	0.117237
T. coracinus	F	0.093	14.85	0.285522	0.560269	0.2633	0.161616	0.156902	0.156902	0.187879	0.125926
T. coracinus	M	0.111	16.52	0.283293	0.541162	0.261501	0.171913	0.15799	0.168886	0.187651	0.131961
T. coracinus	M	0.077	14.42	0.280166	0.554092	0.253121	0.159501	0.162275	0.161581	0.174757	0.122053
T. coracinus	F	0.048	14.16	0.310734	0.55791	0.266949	0.164548	0.146893	0.169492	0.175141	0.125706
T. coracinus	F	0.111	16.44	0.282238	0.557178	0.25365	0.160584	0.160584	0.1618	0.172141	0.120438
T. coracinus	F	0.078	14.03	0.300784	0.557377	0.267284	0.161796	0.150392	0.166073	0.17819	0.126158
T. coracinus	F	0.051	13.55	0.280443	0.557196	0.265683	0.1631	0.1631	0.164576	0.177122	0.115129
T. coracinus	M	0.125	16.73	0.280932	0.563658	0.246862	0.161387	0.156605	0.163778	0.174537	0.115959
T. coracinus	M	0.085	14.34	0.283124	0.564854	0.271967	0.170851	0.152022	0.168759	0.167364	0.114365
T. coracinus	F	0.12	16	0.29	0.5575	0.263125	0.168125	0.164375	0.165625	0.163125	0.1125
T. coracinus	M	0.097	15.31	0.287394	0.555846	0.252776	0.163292	0.15676	0.165251	0.182234	0.122142
T. coracinus	F	0.113	15.75	0.289524	0.568254	0.259683	0.167619	0.154921	0.16127	0.175238	0.115556
T. coracinus	M	0.105	15.74	0.277637	0.552097	0.263659	0.170902	0.160737	0.175349	0.174079	0.111817
T. coracinus	F	0.093	15.51	0.286267	0.571244	0.246937	0.156673	0.151515	0.159252	0.176015	0.117988
T. coracinus	F	0.089	15.39	0.282001	0.552307	0.25601	0.161144	0.164392	0.161793	0.161793	0.121507
T. coracinus	M	0.101	15.67	0.277601	0.558392	0.257817	0.17358	0.14933	0.172304	0.174218	0.119974
T. coracinus	M	0.118	16.51	0.279225	0.557844	0.251969	0.172017	0.145972	0.167777	0.183525	0.128407
T. coracinus	F	0.102	16.32	0.308211	0.5625	0.261642	0.18076	0.148897	0.167892	0.166054	0.120711
T. coracinus	F	0.095	15.48	0.283592	0.571059	0.257752	0.161499	0.148579	0.152455	0.181525	0.127907
T. coracinus	F	0.088	15.67	0.298022	0.563497	0.252074	0.164646	0.150606	0.160817	0.170389	0.12508
T. coracinus	F	0.117	16.14	0.286245	0.547088	0.262082	0.165428	0.159232	0.165428	0.17658	0.128253
T. coracinus	F	0.095	14.96	0.27607	0.554144	0.266043	0.161096	0.155749	0.166444	0.176471	0.123663
T. coracinus	F	0.086	14.88	0.296371	0.561828	0.263441	0.170699	0.147849	0.16129	0.193548	0.129032
T. coracinus	F	0.079	14.59	0.282385	0.5634	0.261823	0.156271	0.148047	0.164496	0.166552	0.124058
T. coracinus	M	0.061	13.32	0.277778	0.559309	0.258258	0.161411	0.154655	0.160661	0.173423	0.125375
T. coracinus	F	0.116	16.29	0.284223	0.560467	0.251688	0.169429	0.153468	0.164518	0.169429	0.121547
T. coracinus	M	0.092	15.18	0.285903	0.551383	0.256258	0.163373	0.158762	0.166667	0.171278	0.123188
T. coracinus	F	0.088	14.39	0.305768	0.565671	0.257818	0.165393	0.156359	0.155664	0.168867	0.122307
T. coracinus	F	0.109	15.78	0.285171	0.559569	0.264892	0.164132	0.151458	0.160963	0.18251	0.12801
T. coracinus	F	0.075	15.64	0.303069	0.548593	0.262788	0.165601	0.161765	0.159847	0.181586	0.129795
T. coracinus	F	0.07	14.04	0.277066	0.551282	0.25641	0.157407	0.155983	0.16453	0.176638	0.128205
T. coracinus	M	0.082	15.42	0.259403	0.577173	0.244488	0.155642	0.148508	0.156291	0.167315	0.118029
T. coracinus	F	0.12	16.7	0.290419	0.562275	0.258084	0.171856	0.141317	0.162275	0.171257	0.134132
T. coracinus	F	0.102	15.73	0.278449	0.561983	0.264463	0.165925	0.157661	0.162111	0.160839	0.118245
T. coracinus	M	0.075	15.68	0.276148	0.555485	0.253189	0.163903	0.157526	0.160077	0.178571	0.126913
T. coracinus	F	0.092	15.09	0.280981	0.561299	0.263088	0.163685	0.151093	0.161696	0.167661	0.125911
T. coracinus	F	0.104	14.63	0.307587	0.563226	0.260424	0.160629	0.142857	0.158578	0.183185	0.135338
T. coracinus	F	0.1	15.67	0.282706	0.560306	0.257179	0.160179	0.144863	0.158902	0.185067	0.135929
T. coracinus	M	0.136	17.09	0.273844	0.542422	0.257461	0.174371	0.157987	0.171445	0.188414	0.128145
T. coracinus	F	0.105	15.66	0.289911	0.551086	0.257344	0.167944	0.157727	0.162197	0.172414	0.128991
T. coracinus	F	0.1	15.91	0.285355	0.554368	0.258957	0.161534	0.160905	0.158391	0.177876	0.126336
T. coracinus	F	0.115	16.35	0.281346	0.552905	0.251988	0.164526	0.143731	0.174312	0.18104	0.129052
T. coracinus	F	0.14	17.05	0.291496	0.554252	0.256891	0.173607	0.158358	0.163636	0.187097	0.123754
T. coracinus	F	0.117	16.8	0.322024	0.555357	0.26131	0.166071	0.155952	0.159524	0.177381	0.129167
T. coracinus	M	0.097	15.93	0.273697	0.546139	0.250471	0.16447	0.166981	0.160703	0.180163	0.126177
T. coracinus	M	0.135	17.33	0.290825	0.54472	0.249279	0.171379	0.160415	0.168494	0.186382	0.12637
T. coracinus	F	0.127	16.44	0.290146	0.554136	0.265207	0.171533	0.155109	0.172141	0.170316	0.118613
T. fulvipennis everetti	M	0.072	13.71	0.303428	0.525164	0.261853	0.169949	0.161196	0.173596	0.203501	0.140044
T. fulvipennis everetti	M	0.062	12.94	0.285935	0.506182	0.270479	0.173879	0.167697	0.167697	0.215611	0.158423
T. fulvipennis everetti	F	0.069	13.72	0.271866	0.517493	0.270408	0.169825	0.172012	0.163994	0.204082	0.146501
T. fulvipennis everetti	M	0.069	13.73	0.250546	0.517844	0.268755	0.169701	0.158048	0.176985	0.208303	0.147123
T. fulvipennis everetti	M	0.063	13.75	0.263273	0.521455	0.260364	0.156364	0.160727	0.168727	0.216727	0.149091
T. fulvipennis everetti	F	0.117	15.22	0.338371	0.507227	0.285151	0.17477	0.164915	0.180026	0.217477	0.147832
T. fulvipennis everetti	M	0.186	19.36	0.264979	0.52376	0.246901	0.166322	0.178719	0.152893	0.213843	0.144628
T. fulvipennis everetti	F	0.181	19.86	0.282981	0.553374	0.234642	0.156093	0.162135	0.155589	0.179255	0.128902
T. fulvipennis everetti	F	0.161	19.36	0.257748	0.533574	0.247934	0.16219	0.175103	0.145145	0.19938	0.146178
T. fulvipennis everetti	M	0.182	19.78	0.254803	0.539434	0.24368	0.167341	0.165319	0.16178	0.20273	0.133468
T. fulvipennis everetti	M	0.06	13.16	0.259878	0.515957	0.265198	0.163374	0.164894	0.162614	0.218085	0.156535
T. fulvipennis everetti	M	0.057	12.91	0.278079	0.525174	0.260263	0.168861	0.163439	0.163439	0.206816	0.147947
T. fulvipennis everetti	F	0.085	14.54	0.275791	0.516506	0.25447	0.167813	0.176066	0.169876	0.207703	0.137552
T. fulvipennis everetti	F	0.061	12.88	0.277174	0.524845	0.267857	0.17236	0.16382	0.167702	0.197205	0.143634
T. fulvipennis everetti	M	0.145	17.52	0.25742	0.513128	0.260274	0.171804	0.186073	0.164954	0.20605	0.135845
T. fulvipennis everetti	M	0.12	16.76	0.27148	0.50716	0.27327	0.178998	0.193317	0.162888	0.202864	0.136635
T. fulvipennis everetti	M	0.134	17.08	0.260539	0.513466	0.261124	0.17096	0.190281	0.163934	0.198478	0.132319
T. fulvipennis everetti	F	0.187	19.37	0.282395	0.513681	0.252969	0.162623	0.178627	0.159525	0.213733	0.148167
T. fulvipennis everetti	F	0.198	18.35	0.307902	0.543869	0.267575	0.173842	0.177112	0.160218	0.186376	0.118801
T. fulvipennis everetti	M	0.139	17.45	0.257307	0.50659	0.259026	0.16447	0.183954	0.16447	0.200573	0.144986
T. fulvipennis everetti	F	0.19	18.95	0.275989	0.525594	0.258575	0.169921	0.168865	0.158839	0.201583	0.146702
T. fulvipennis everetti	M	0.095	14.85	0.280808	0.523232	0.275421	0.181145	0.152189	0.176431	0.207407	0.148148
T. fulvipennis everetti	F	0.098	15.16	0.312665	0.522427	0.272427	0.176781	0.16029	0.173483	0.200528	0.143799
T. fulvipennis everetti	F	0.093	15.17	0.277521	0.527357	0.264997	0.168754	0.162821	0.170073	0.210283	0.13975
T. fulvipennis everetti	M	0.131	16.47	0.279903	0.523376	0.265938	0.184578	0.165756	0.175471	0.195507	0.135398
T. fulvipennis everetti	M	0.097	15.24	0.280184	0.524934	0.26706	0.176509	0.16601	0.172572	0.203412	0.136483
T. fulvipennis everetti	F	0.093	15.63	0.278951	0.529111	0.271913	0.184901	0.158029	0.176583	0.197057	0.136276
T. fulvipennis everetti	M	0.091	14.33	0.28053	0.526867	0.277739	0.184927	0.155618	0.180042	0.200279	0.137474
T. fulvipennis everetti	M	0.1	15.1	0.270861	0.528477	0.272185	0.177483	0.168212	0.172185	0.201987	0.131126
T. fulvipennis everetti	M	0.098	15.36	0.267578	0.519531	0.266927	0.171224	0.159505	0.175781	0.207031	0.145182
T. fulvipennis everetti	F	0.078	14.21	0.277973	0.52639	0.270232	0.168191	0.161858	0.17171	0.190007	0.140042
T. fulvipennis everetti	M	0.108	15.69	0.272148	0.515615	0.268961	0.173359	0.172084	0.169535	0.205226	0.142766
T. fulvipennis everetti	M	0.106	16.14	0.265799	0.522305	0.266419	0.185254	0.159851	0.180297	0.192689	0.137546
T. fulvipennis everetti	M	0.082	14.28	0.27591	0.518207	0.270308	0.172969	0.168067	0.181373	0.196779	0.132353
T. fulvipennis everetti	F	0.099	15.73	0.27527	0.527018	0.268277	0.175461	0.169104	0.169104	0.198347	0.134774
T. fulvipennis everetti	M	0.1	15.67	0.262285	0.520102	0.266752	0.177409	0.162093	0.174856	0.202297	0.142948
T. fulvipennis everetti	M	0.092	14.93	0.25921	0.517749	0.274615	0.170797	0.159411	0.174816	0.207636	0.148024
T. fulvipennis everetti	M	0.091	14.95	0.26689	0.513712	0.27291	0.179264	0.158528	0.183946	0.19398	0.143813
T. fulvipennis everetti	F	0.092	14.81	0.282242	0.529372	0.263336	0.166779	0.158001	0.171506	0.199865	0.141121
T. fulvipennis everetti	M	0.106	15.36	0.278646	0.527995	0.26237	0.174479	0.169922	0.179688	0.185547	0.122396
T. fulvipennis everetti	F	0.103	15.31	0.286088	0.518615	0.268452	0.173089	0.163945	0.174396	0.207054	0.143044
T. fulvipennis everetti	M	0.094	14.84	0.307278	0.530997	0.274259	0.181267	0.160377	0.173181	0.199461	0.135445
T. fulvipennis everetti	F	0.07	14.54	0.268226	0.51238	0.264787	0.167125	0.171252	0.167813	0.190509	0.148556
T. fulvipennis everetti	F	0.086	14.9	0.281208	0.524832	0.271141	0.17651	0.169799	0.173154	0.196644	0.132215
T. fulvipennis everetti	M	0.067	13.98	0.265379	0.521459	0.273963	0.178112	0.16309	0.182403	0.195279	0.133047
T. fulvipennis everetti	M	0.104	15.73	0.290528	0.527018	0.270184	0.178004	0.171011	0.177368	0.200254	0.124603
T. fulvipennis everetti	M	0.117	16.11	0.274364	0.527002	0.264432	0.179392	0.165736	0.171322	0.2036	0.13594
T. fulvipennis everetti	M	0.09	14.72	0.273777	0.527174	0.264266	0.181386	0.157609	0.180707	0.200408	0.134511
T. fulvipennis everetti	M	0.061	13.78	0.267054	0.526125	0.253266	0.165457	0.166909	0.164731	0.20537	0.142235
T. fulvipennis everetti	F	0.083	14.74	0.278155	0.516961	0.2673	0.178426	0.161465	0.172999	0.205563	0.148575
T. fulvipennis everetti	M	0.091	14.88	0.257392	0.512097	0.276882	0.174059	0.164651	0.182124	0.203629	0.141129
T. fulvipennis everetti	M	0.058	13.3	0.257143	0.522556	0.26015	0.166165	0.164662	0.166165	0.214286	0.146617
T. fulvipennis everetti	M	0.059	13.21	0.266465	0.520818	0.260409	0.17184	0.172597	0.168812	0.214232	0.137774
T. fulvipennis everetti	M	0.057	12.67	0.265193	0.529597	0.270718	0.169692	0.1618	0.167324	0.21468	0.141279
T. fulvipennis everetti	F	0.084	14.78	0.282138	0.521651	0.26387	0.169147	0.173884	0.170501	0.205007	0.133965
T. fulvipennis everetti	F	0.092	14.95	0.302341	0.523746	0.269565	0.177258	0.155184	0.18194	0.225418	0.13913
T. fulvipennis everetti	M	0.08	14.71	0.258328	0.522094	0.260367	0.168593	0.171312	0.170632	0.202583	0.135962
T. fulvipennis everetti	M	0.084	14.86	0.270525	0.530283	0.263122	0.170929	0.178331	0.164199	0.195155	0.127187
T. fulvipennis everetti	M	0.064	13.32	0.322072	0.517267	0.27027	0.176426	0.168919	0.168919	0.219219	0.144895
T. fulvipennis everetti	M	0.079	14.94	0.257697	0.514726	0.261044	0.159973	0.182062	0.171352	0.198126	0.131861
T. fulvipennis everetti	M	0.063	13.6	0.25	0.515441	0.266912	0.170588	0.167647	0.172794	0.209559	0.144118
T.fasciatus fasciatus	M	0.046	11.44	0.269231	0.527098	0.276224	0.181818	0.173077	0.172203	0.172203	0.127622
T.fasciatus fasciatus	M	0.043	11.51	0.276281	0.516073	0.273675	0.189401	0.156386	0.190269	0.18245	0.137272
T.fasciatus fasciatus	F	0.052	11.93	0.285834	0.559933	0.264878	0.176027	0.137469	0.178541	0.17435	0.124057
T.fasciatus fasciatus	M	0.046	11.8	0.269492	0.516102	0.269492	0.183051	0.15678	0.185593	0.200847	0.141525
T.fasciatus fasciatus	M	0.049	11.67	0.277635	0.538132	0.279349	0.184233	0.151671	0.182519	0.186804	0.127678
T.fasciatus fasciatus	M	0.043	11.42	0.291594	0.535902	0.28634	0.182137	0.161996	0.177758	0.162872	0.124343
T.fasciatus fasciatus	M	0.052	12.24	0.273693	0.521242	0.272876	0.183824	0.154412	0.18219	0.196895	0.142157
T.fasciatus fasciatus	M	0.049	11.86	0.296796	0.548904	0.275717	0.18887	0.155143	0.184654	0.162732	0.111298
T.fasciatus fasciatus	F	0.038	11.32	0.289753	0.553004	0.277385	0.173145	0.162544	0.177562	0.163428	0.10689
T.fasciatus fasciatus	M	0.055	11.89	0.300252	0.561817	0.281749	0.197645	0.138772	0.188394	0.154752	0.111018
T.fasciatus fasciatus	F	0.047	12.06	0.28607	0.555556	0.277778	0.177446	0.141791	0.175788	0.179104	0.126866
T.fasciatus fasciatus	F	0.041	12.08	0.280629	0.541391	0.271523	0.181291	0.160596	0.172185	0.18543	0.125828
T.fasciatus fasciatus	M	0.048	12.14	0.308072	0.550247	0.268534	0.18369	0.149094	0.184514	0.158155	0.116145
T.fasciatus fasciatus	F	0.045	11.62	0.27883	0.532702	0.272806	0.172117	0.152324	0.175559	0.19105	0.139415
T.fasciatus fasciatus	F	0.043	11.24	0.283808	0.551601	0.27847	0.177046	0.146797	0.176157	0.180605	0.125445
T.fasciatus fasciatus	M	0.047	12.36	0.319579	0.532362	0.271036	0.177184	0.156149	0.176375	0.184466	0.135113
T.fasciatus fasciatus	M	0.047	12.2	0.278689	0.542623	0.269672	0.181967	0.144262	0.183607	0.17623	0.129508
T.fasciatus fasciatus	M	0.043	11.07	0.280036	0.526649	0.281843	0.189702	0.153568	0.185185	0.186992	0.134598
T.fasciatus fasciatus	F	0.049	11.66	0.279588	0.544597	0.280446	0.181818	0.143225	0.175815	0.188679	0.136364
T.fasciatus fasciatus	F	0.038	11.57	0.286949	0.560933	0.272256	0.185825	0.128781	0.172861	0.203976	0.137424
T.fasciatus fasciatus	F	0.046	12.31	0.28026	0.530463	0.275386	0.183591	0.153534	0.180341	0.190902	0.135662
T.fasciatus fasciatus	F	0.048	11.76	0.330782	0.55102	0.27381	0.177721	0.131803	0.17602	0.185374	0.141156
T.fasciatus fasciatus	M	0.048	12.66	0.267773	0.508689	0.274882	0.180885	0.160348	0.182464	0.21327	0.148499
T.fasciatus fasciatus	F	0.049	12.19	0.326497	0.553733	0.267432	0.174733	0.135357	0.170632	0.188679	0.140279
T.fasciatus fasciatus	F	0.039	12.06	0.299337	0.553897	0.268657	0.1733	0.130182	0.174129	0.189055	0.141791
T.fasciatus fasciatus	F	0.05	11.96	0.285953	0.530936	0.277592	0.178094	0.154682	0.172241	0.184783	0.14214
T.fasciatus fasciatus	F	0.045	12.36	0.275081	0.519417	0.274272	0.185275	0.151294	0.182039	0.201456	0.147249
T.fasciatus fasciatus	M	0.048	11.66	0.313894	0.515437	0.289022	0.186964	0.156947	0.189537	0.168954	0.138079
T.fasciatus fasciatus	M	0.044	12.01	0.268943	0.529559	0.269775	0.17985	0.158201	0.180683	0.179017	0.131557
T.fasciatus fasciatus	M	0.051	12.45	0.264257	0.514859	0.262651	0.17992	0.166265	0.180723	0.185542	0.138153
T.fasciatus fasciatus	F	0.034	11.65	0.280687	0.545923	0.27382	0.178541	0.141631	0.173391	0.195708	0.139056
T.fasciatus fasciatus	M	0.055	12.77	0.263117	0.494127	0.259984	0.175411	0.185591	0.172279	0.192639	0.148003
T.fasciatus fasciatus	M	0.044	11.95	0.274477	0.517155	0.265272	0.174895	0.169874	0.18159	0.185774	0.131381
T.fasciatus fasciatus	F	0.042	10.92	0.28663	0.561355	0.285714	0.179487	0.127289	0.17674	0.185897	0.134615
T.fasciatus fasciatus	F	0.035	11.38	0.285589	0.52812	0.268893	0.181019	0.153779	0.179262	0.195958	0.13884
T.fasciatus fasciatus	M	0.047	11.37	0.283201	0.525066	0.291117	0.195251	0.16095	0.190853	0.166227	0.123131
T.fasciatus fasciatus	M	0.044	11.94	0.288107	0.518425	0.273869	0.180067	0.156616	0.175042	0.193467	0.149916
T.fasciatus fasciatus	M	0.041	11.93	0.26907	0.521375	0.273261	0.181894	0.145013	0.181894	0.195306	0.151718
T.fasciatus fasciatus	F	0.049	11.73	0.277067	0.526002	0.276215	0.186701	0.143223	0.186701	0.191816	0.144075
T.fasciatus fasciatus	M	0.049	12.43	0.294449	0.531778	0.264682	0.172164	0.144006	0.176187	0.205953	0.148029
T.fasciatus fasciatus	M	0.055	12.43	0.270314	0.5358	0.277554	0.193886	0.145615	0.18745	0.196299	0.131134
T.fasciatus fasciatus	M	0.05	12.28	0.289088	0.531759	0.272801	0.185668	0.141694	0.184853	0.185668	0.141694
T.fasciatus fasciatus	M	0.048	12.36	0.274272	0.519417	0.265372	0.178803	0.15534	0.177994	0.193366	0.147249
T.fasciatus fasciatus	M	0.039	11.28	0.304078	0.533688	0.269504	0.179078	0.144504	0.182624	0.176418	0.139184
T.fasciatus fasciatus	F	0.051	12.09	0.272953	0.526882	0.269644	0.17866	0.147229	0.17866	0.19603	0.147229
T.fasciatus fasciatus	F	0.043	11.47	0.281604	0.533566	0.272014	0.177855	0.148213	0.176983	0.179599	0.141238
T.fasciatus fasciatus	M	0.051	12.47	0.263031	0.522053	0.262229	0.182037	0.154771	0.176423	0.200481	0.146752
T.fasciatus fasciatus	F	0.044	11.84	0.27027	0.523649	0.268581	0.179899	0.15625	0.174831	0.201014	0.14527
T.fasciatus fasciatus	M	0.047	12.17	0.270337	0.530813	0.261298	0.180772	0.14544	0.179129	0.198028	0.144618
T.fasciatus fasciatus	M	0.039	11.58	0.26943	0.505181	0.272021	0.17962	0.169257	0.173575	0.199482	0.151986
T.fasciatus fasciatus	M	0.041	11.88	0.295455	0.532828	0.253367	0.179293	0.14899	0.174242	0.194444	0.143939
T.fasciatus fasciatus	F	0.049	12.19	0.304348	0.529943	0.269893	0.185398	0.144381	0.181296	0.195242	0.144381
T.fasciatus fasciatus	M	0.049	12.09	0.26799	0.513648	0.272126	0.181969	0.1555	0.180314	0.195203	0.150538
T.fasciatus fasciatus	F	0.048	12.36	0.275081	0.520227	0.268608	0.177184	0.150485	0.180421	0.186893	0.148867
T.fasciatus fasciatus	M	0.037	11.92	0.269295	0.529362	0.269295	0.178691	0.156879	0.176174	0.205537	0.137584
T.fasciatus fasciatus	M	0.05	12.28	0.262215	0.510586	0.273616	0.18241	0.15798	0.180782	0.189739	0.150651
T.fasciatus fasciatus	F	0.041	11.29	0.286094	0.534101	0.285208	0.183348	0.142604	0.18512	0.183348	0.138175
T.fasciatus fasciatus	F	0.048	12.16	0.286184	0.546053	0.268092	0.175164	0.144737	0.172697	0.195724	0.136513
T.fasciatus fasciatus	M	0.047	11.85	0.273418	0.52827	0.278481	0.174684	0.167932	0.176371	0.180591	0.127426
T.fasciatus fasciatus	F	0.046	11.52	0.28559	0.543403	0.278646	0.181424	0.153646	0.173611	0.197917	0.12934
T.fasciatus fasciatus	M	0.048	12.28	0.267101	0.52443	0.267101	0.18241	0.140065	0.184039	0.190554	0.151466
T.fasciatus fasciatus	M	0.042	11.91	0.257767	0.515533	0.263644	0.177162	0.163728	0.178841	0.188077	0.141898
T.fasciatus fasciatus	F	0.029	10.53	0.31434	0.529915	0.297246	0.194682	0.140551	0.186135	0.20133	0.1434
T.fasciatus fasciatus	M	0.044	11.48	0.279617	0.529617	0.278746	0.18554	0.148084	0.180314	0.182927	0.141986
T.fasciatus fasciatus	F	0.048	12	0.2875	0.539167	0.266667	0.176667	0.149167	0.175833	0.186667	0.135833
T.fasciatus fasciatus	M	0.048	12.24	0.285131	0.541667	0.272059	0.18219	0.138889	0.185458	0.167484	0.133987
T.fasciatus fasciatus	M	0.04	11.31	0.297966	0.534925	0.27763	0.181256	0.140584	0.183908	0.198939	0.140584
T.fasciatus fasciatus	M	0.05	12.48	0.302083	0.542468	0.265224	0.180288	0.139423	0.182692	0.173878	0.135417
T.fasciatus fasciatus	M	0.052	12.36	0.26699	0.540453	0.262136	0.180421	0.136731	0.180421	0.200647	0.142395
T.fasciatus fasciatus	M	0.042	11.82	0.265651	0.519459	0.27242	0.185279	0.159898	0.181049	0.187817	0.139594
T.fasciatus fasciatus	F	0.044	11.44	0.29458	0.535839	0.277098	0.173951	0.155594	0.177448	0.180944	0.131119
T.fasciatus fasciatus	M	0.039	12.99	0.253272	0.487298	0.254811	0.17398	0.150885	0.17475	0.187067	0.137798
T.fasciatus fasciatus	M	0.041	11.88	0.289562	0.545455	0.272727	0.181818	0.144781	0.175926	0.186027	0.133838
T.fasciatus fasciatus	M	0.043	11.99	0.281902	0.537948	0.264387	0.17181	0.144287	0.18015	0.187656	0.137615
T.fasciatus fasciatus	M	0.05	11.78	0.274194	0.521222	0.28438	0.191851	0.140917	0.191851	0.201188	0.14601
T.fasciatus fasciatus	M	0.046	11.5	0.28	0.52087	0.28087	0.187826	0.158261	0.176522	0.203478	0.144348
T.fasciatus fasciatus	M	0.039	11.25	0.276444	0.539556	0.275556	0.184889	0.139556	0.185778	0.206222	0.135111
T.fasciatus fasciatus	F	0.044	12.72	0.279874	0.515723	0.258648	0.180031	0.178459	0.17217	0.18239	0.133648
T.fasciatus fasciatus	M	0.051	12.54	0.264753	0.515152	0.257576	0.182616	0.157895	0.179426	0.201754	0.147528
T.fasciatus fasciatus	M	0.038	11.3	0.299115	0.530088	0.272566	0.180531	0.142478	0.187611	0.187611	0.139823
T.fasciatus fasciatus	M	0.036	11.08	0.296931	0.542419	0.271661	0.1787	0.143502	0.176895	0.185921	0.137184
T.fasciatus fasciatus	M	0.05	12.38	0.268174	0.542811	0.271405	0.184168	0.137318	0.178514	0.188207	0.141357
T.fasciatus fasciatus	F	0.048	11.86	0.293423	0.554806	0.273187	0.183811	0.129005	0.181282	0.194772	0.134907
T.fasciatus fasciatus	M	0.047	12.03	0.261014	0.512053	0.264339	0.177057	0.161264	0.184539	0.194514	0.142145
T.fasciatus fasciatus	M	0.047	11.89	0.306981	0.533221	0.275021	0.179142	0.144659	0.182506	0.195122	0.139613
T.fasciatus fasciatus	F	0.033	11.77	0.286321	0.543755	0.261682	0.174172	0.149533	0.169074	0.192014	0.137638
T.fasciatus fasciatus	M	0.06	13.66	0.256955	0.524158	0.259151	0.175695	0.147877	0.177892	0.191801	0.150073
T.fasciatus fasciatus	M	0.047	12.31	0.259139	0.516653	0.260764	0.175467	0.153534	0.181966	0.184403	0.147847
T.fasciatus fasciatus	M	0.048	11.87	0.272957	0.535805	0.278854	0.187869	0.153328	0.176917	0.177759	0.133951
T.fasciatus fasciatus	M	0.042	11.59	0.267472	0.52459	0.277826	0.185505	0.150129	0.188956	0.197584	0.136324
T.fasciatus fasciatus	F	0.041	11.58	0.307427	0.557858	0.273748	0.17962	0.126943	0.185665	0.181347	0.129534
T.fasciatus fasciatus	F	0.049	11.75	0.314894	0.554894	0.268936	0.179574	0.141277	0.173617	0.18383	0.130213
T.fasciatus fasciatus	M	0.061	12.95	0.254826	0.514286	0.279537	0.187645	0.156757	0.183012	0.203089	0.145946
T.fasciatus fasciatus	M	0.051	12.14	0.268534	0.514003	0.282537	0.192751	0.162273	0.186161	0.200988	0.137562
T.fasciatus fasciatus	M	0.053	12.62	0.276545	0.525357	0.267036	0.183835	0.146593	0.183835	0.191759	0.144216
T.fasciatus fasciatus	F	0.049	12.09	0.293631	0.550868	0.271299	0.181969	0.135649	0.175352	0.191067	0.138131
T.fasciatus fasciatus	M	0.042	11.62	0.275387	0.532702	0.270224	0.185026	0.143718	0.174699	0.213425	0.148881
T.fasciatus fasciatus	F	0.035	11.38	0.314587	0.544815	0.271529	0.175747	0.142355	0.173111	0.195958	0.139719
T.fasciatus fasciatus	F	0.04	12.25	0.276735	0.54449	0.266939	0.178776	0.15102	0.17551	0.187755	0.12898
T.fasciatus fasciatus	F	0.034	11.38	0.286467	0.54833	0.274165	0.183656	0.140598	0.175747	0.186292	0.135325
T.fasciatus fasciatus	M	0.044	11.75	0.282553	0.526809	0.275745	0.185532	0.159149	0.181277	0.18383	0.132766
T.fasciatus fasciatus	M	0.042	12.39	0.283293	0.508475	0.251816	0.176755	0.142857	0.171106	0.177563	0.127522
T.fasciatus fasciatus	M	0.032	11.05	0.275113	0.530317	0.258824	0.174661	0.162896	0.171041	0.18371	0.135747
T.fasciatus fasciatus	F	0.043	11.13	0.321653	0.560647	0.286613	0.181491	0.138365	0.17071	0.17071	0.130279
T.fasciatus fasciatus	M	0.038	10.93	0.301006	0.537969	0.279963	0.191217	0.137237	0.174748	0.187557	0.150046
T.fasciatus fasciatus	M	0.047	11.96	0.281773	0.520067	0.271739	0.189799	0.157191	0.181438	0.198997	0.141304
T.fasciatus fasciatus	M	0.048	11.84	0.288851	0.526182	0.259291	0.180743	0.160473	0.169764	0.199324	0.143581
T.fasciatus fasciatus	M	0.05	11.55	0.278788	0.54026	0.283117	0.194805	0.142857	0.187879	0.212121	0.129004
T.fasciatus fasciatus	M	0.053	11.98	0.286311	0.517529	0.282972	0.187813	0.156928	0.194491	0.202838	0.131052
T.fasciatus fasciatus	F	0.032	12.28	0.276059	0.540717	0.271173	0.17671	0.158795	0.170195	0.175896	0.130293
T.fasciatus fasciatus	M	0.058	12.41	0.281225	0.526994	0.269944	0.190169	0.150685	0.182111	0.202256	0.14021
T.fasciatus fasciatus	M	0.045	11.68	0.268836	0.521404	0.278253	0.181507	0.15411	0.177226	0.196918	0.14726
T.fasciatus fasciatus	F	0.045	12.05	0.277178	0.547718	0.271369	0.175104	0.147718	0.172614	0.173444	0.13195
T.fasciatus fasciatus	F	0.055	12.79	0.267396	0.53792	0.196247	0.179828	0.140735	0.175137	0.189992	0.146208
T.fasciatus fasciatus	M	0.052	12.42	0.264895	0.543478	0.268921	0.181965	0.136876	0.177134	0.186795	0.142512
T.fasciatus fasciatus	M	0.038	12.45	0.282731	0.530924	0.262651	0.178313	0.146185	0.171084	0.193574	0.151807
T.fasciatus fasciatus	M	0.043	11.64	0.275773	0.515464	0.286942	0.194158	0.176117	0.180412	0.181271	0.128007
T.fasciatus fasciatus	M	0.054	12.55	0.273307	0.513147	0.270916	0.188048	0.158566	0.180876	0.191235	0.14741
T.fasciatus fasciatus	M	0.051	12.03	0.282627	0.535328	0.276808	0.190357	0.143807	0.189526	0.192851	0.131338
T.fasciatus fasciatus	M	0.038	11.96	0.266722	0.533445	0.274247	0.182274	0.144649	0.173913	0.190635	0.147993
T.fasciatus fasciatus	M	0.049	12.17	0.277732	0.52424	0.273624	0.183237	0.144618	0.185703	0.191454	0.14544
T.fasciatus fasciatus	F	0.029	10.27	0.326193	0.566699	0.300876	0.199611	0.140214	0.189873	0.200584	0.103213
T.fasciatus fasciatus	M	0.051	12.16	0.268092	0.523849	0.277961	0.179276	0.158717	0.175164	0.189967	0.14227
T.fasciatus fasciatus	M	0.05	12.05	0.282988	0.543568	0.271369	0.185892	0.141909	0.182573	0.172614	0.13195
T.fasciatus fasciatus	M	0.042	11.82	0.262267	0.538071	0.269036	0.175127	0.142978	0.174281	0.194585	0.14467
T.fasciatus fasciatus	M	0.041	11.21	0.272079	0.528992	0.275647	0.183764	0.149866	0.183764	0.190901	0.137377
T.fasciatus fasciatus	M	0.044	12.17	0.30567	0.545604	0.268694	0.175021	0.144618	0.179951	0.193919	0.129827
T.fasciatus fasciatus	F	0.049	11.75	0.284255	0.548085	0.274043	0.182979	0.150638	0.177872	0.169362	0.123404
T.fasciatus fasciatus	F	0.044	12.44	0.288585	0.549035	0.28135	0.184084	0.138264	0.176045	0.191318	0.136656
T.fasciatus fasciatus	F	0.053	11.82	0.287648	0.556684	0.280034	0.189509	0.13621	0.176819	0.194585	0.130288
T.fasciatus fasciatus	M	0.035	10.88	0.282169	0.53125	0.278493	0.174632	0.144301	0.185662	0.179228	0.138787
T.fasciatus fasciatus	M	0.035	10.4	0.316346	0.532692	0.296154	0.181731	0.141346	0.1875	0.180769	0.138462
T.fasciatus fasciatus	F	0.032	11.82	0.278342	0.533841	0.271574	0.181049	0.14044	0.186125	0.19797	0.139594
T.fasciatus fasciatus	F	0.044	11.88	0.302189	0.547138	0.281987	0.185185	0.127946	0.180976	0.195286	0.143939
T.fasciatus fasciatus	F	0.042	11.46	0.280105	0.54363	0.274869	0.17452	0.151832	0.166667	0.187609	0.137871
T.fasciatus fasciatus	F	0.045	12.09	0.268817	0.513648	0.247312	0.17866	0.16708	0.174524	0.186104	0.144748
T.fasciatus fasciatus	M	0.044	12.24	0.308824	0.531046	0.273693	0.183824	0.147876	0.183007	0.183007	0.138072
T.fasciatus fasciatus	M	0.033	11.61	0.303187	0.53919	0.279931	0.180879	0.150732	0.169681	0.18174	0.140396
T.fasciatus fasciatus	F	0.046	11.56	0.281142	0.538062	0.277682	0.182526	0.143599	0.190311	0.197232	0.128028
T.fasciatus fasciatus	M	0.041	10.91	0.283226	0.535289	0.292392	0.19615	0.137489	0.191567	0.202566	0.135655
T.fasciatus fasciatus	F	0.047	11.42	0.307356	0.538529	0.285464	0.177758	0.145359	0.183888	0.206655	0.132224
T.fasciatus fasciatus	M	0.044	11.34	0.276896	0.522046	0.275132	0.18254	0.161376	0.18254	0.196649	0.134039
T.fasciatus fasciatus	M	0.027	10.01	0.27972	0.533467	0.275724	0.178821	0.146853	0.183816	0.211788	0.135864
T.fasciatus fasciatus	F	0.035	11.02	0.296733	0.53176	0.279492	0.182396	0.145191	0.18784	0.208711	0.135209
T.fasciatus fasciatus	M	0.041	11.72	0.267065	0.516212	0.267918	0.143345	0.172355	0.180887	0.201365	0.130546
T.fasciatus fasciatus	M	0.03	10.41	0.28146	0.539866	0.282421	0.182517	0.138329	0.180596	0.217099	0.14121
T.fasciatus fasciatus	M	0.044	11.72	0.274744	0.526451	0.280717	0.187713	0.150171	0.18942	0.200512	0.133959
T.fasciatus fasciatus	M	0.036	11.47	0.280732	0.522232	0.283348	0.188317	0.154316	0.188317	0.215344	0.135135
T.fasciatus fasciatus	M	0.033	10.61	0.288407	0.518379	0.269557	0.183789	0.154571	0.191329	0.216777	0.135721
T.fasciatus fasciatus	M	0.035	11.28	0.328014	0.511525	0.276596	0.178191	0.170213	0.182624	0.194149	0.135638
T.fasciatus fasciatus	M	0.041	11.23	0.288513	0.527159	0.28228	0.191451	0.140695	0.193232	0.206589	0.138914
T.fasciatus fasciatus	M	0.04	11.13	0.286613	0.526505	0.274933	0.185085	0.154537	0.19407	0.187781	0.124888
T.fasciatus fasciatus	M	0.045	11.79	0.275657	0.513147	0.280746	0.186599	0.156913	0.189992	0.198473	0.139949
T.fasciatus fasciatus	M	0.042	11.44	0.280594	0.520979	0.283217	0.191434	0.155594	0.192308	0.194056	0.131119
T.fasciatus fasciatus	M	0.042	11.71	0.274979	0.526046	0.277541	0.18702	0.153715	0.180188	0.214347	0.140051
T.fasciatus fasciatus	F	0.043	11.41	0.290096	0.530237	0.281332	0.184926	0.149869	0.189308	0.196319	0.130587
T.fasciatus fasciatus	M	0.04	11.27	0.285714	0.519965	0.28039	0.184561	0.150843	0.192547	0.212067	0.136646
T.fasciatus fasciatus	M	0.041	10.87	0.290708	0.517939	0.285189	0.187672	0.147194	0.199632	0.204232	0.135235
T.fasciatus fasciatus	F	0.038	11.28	0.31383	0.535461	0.287234	0.190603	0.147163	0.18883	0.187943	0.128546
T.fasciatus fasciatus	F	0.049	12.21	0.284193	0.539722	0.277641	0.178542	0.152334	0.180999	0.186732	0.126945
T.fasciatus fasciatus	M	0.052	11.98	0.28798	0.529215	0.286311	0.191987	0.146912	0.182805	0.21202	0.141068
T.fasciatus fasciatus	F	0.044	12.19	0.294504	0.546349	0.280558	0.178835	0.132075	0.182937	0.201805	0.138638
T.fasciatus fasciatus	F	0.04	11.49	0.304613	0.552654	0.273281	0.18799	0.137511	0.187119	0.193211	0.122715
T.fasciatus fasciatus	F	0.044	11.8	0.273729	0.538136	0.266102	0.177966	0.144915	0.184746	0.192373	0.132203
T.fasciatus fasciatus	M	0.04	11.22	0.280749	0.527629	0.270945	0.185383	0.155971	0.183601	0.192513	0.132799
T.fasciatus fasciatus	M	0.048	11.94	0.276382	0.523451	0.279732	0.187605	0.148241	0.201843	0.19263	0.126466
T.fasciatus fasciatus	F	0.032	11.95	0.288703	0.538075	0.274477	0.180753	0.168201	0.177406	0.168201	0.116318
T.fasciatus fasciatus	F	0.044	11.39	0.295874	0.547849	0.279192	0.177349	0.152766	0.174715	0.179104	0.124671
T.fasciatus fasciatus	M	0.041	11.45	0.310917	0.533624	0.281223	0.188646	0.151965	0.188646	0.1869	0.125764
T.fasciatus fasciatus	M	0.038	10.68	0.294944	0.529963	0.28839	0.188202	0.155431	0.191011	0.190075	0.123596
T.fasciatus fasciatus	M	0.035	11.89	0.263246	0.518082	0.264087	0.181665	0.175778	0.179983	0.19344	0.126156
T.fasciatus fasciatus	M	0.052	10.95	0.30411	0.579909	0.302283	0.206393	0.139726	0.156164	0.178082	0.124201
T.fasciatus fasciatus	F	0.038	11.09	0.303877	0.543733	0.283138	0.183048	0.155095	0.178539	0.172227	0.122633
T.fasciatus fasciatus	F	0.057	12.47	0.27506	0.546111	0.263833	0.176423	0.153168	0.182037	0.175621	0.118685
T.fasciatus fasciatus	F	0.06	13.12	0.277439	0.526677	0.266768	0.179878	0.164634	0.182165	0.188262	0.126524
T.fasciatus fasciatus	F	0.058	12.16	0.338816	0.551809	0.273026	0.180921	0.150493	0.176809	0.169408	0.120888
T.fasciatus fasciatus	F	0.06	12.65	0.282213	0.541502	0.273518	0.177075	0.149407	0.177866	0.196838	0.131225
T.fasciatus fasciatus	M	0.056	12.32	0.270292	0.530844	0.269481	0.186688	0.153409	0.179383	0.193182	0.136364
T.fasciatus fasciatus	F	0.042	11.47	0.323452	0.549259	0.27027	0.173496	0.147341	0.173496	0.190061	0.129904
T.fasciatus fasciatus	F	0.043	11.81	0.331075	0.548688	0.270957	0.176122	0.140559	0.176969	0.188823	0.133785
T.fasciatus fasciatus	F	0.048	12.04	0.284884	0.560631	0.268272	0.17608	0.129568	0.177741	0.19103	0.13206
T.fasciatus fasciatus	M	0.049	11.84	0.277027	0.540541	0.273649	0.181588	0.154561	0.179899	0.181588	0.125
T.fasciatus quadrimaculatus	M	0.038	11.64	0.266323	0.522337	0.285223	0.19244	0.145189	0.190722	0.206186	0.141753
T.fasciatus quadrimaculatus	M	0.044	11.42	0.28021	0.521016	0.283713	0.184764	0.156743	0.19352	0.186515	0.128722
T.fasciatus quadrimaculatus	M	0.029	10.75	0.274419	0.52	0.274419	0.185116	0.174884	0.187907	0.16186	0.117209
T.fasciatus quadrimaculatus	M	0.04	11.22	0.277184	0.515152	0.287879	0.188057	0.159537	0.186275	0.197861	0.139037
T.fasciatus quadrimaculatus	F	0.036	10.9	0.268807	0.531193	0.279817	0.177982	0.145872	0.182569	0.190826	0.140367
T.fasciatus quadrimaculatus	M	0.042	11.57	0.272256	0.515125	0.283492	0.188418	0.157303	0.190147	0.19274	0.137424
T.fasciatus quadrimaculatus	M	0.044	11.71	0.268147	0.513237	0.279249	0.186166	0.163962	0.184458	0.192143	0.138343
T.fasciatus quadrimaculatus	F	0.036	11.14	0.29623	0.536804	0.292639	0.183124	0.132855	0.191203	0.194794	0.139138
T.fasciatus quadrimaculatus	F	0.039	11.59	0.286454	0.534944	0.2761	0.180328	0.146678	0.180328	0.189819	0.13805
T.fasciatus quadrimaculatus	M	0.034	10.97	0.272562	0.490428	0.272562	0.170465	0.147675	0.171376	0.130356	0.19052
T.fasciatus quadrimaculatus	M	0.046	11.86	0.278246	0.505902	0.273187	0.181282	0.153457	0.193929	0.202361	0.146712
T.fasciatus quadrimaculatus	M	0.045	11.26	0.28952	0.515098	0.282416	0.186501	0.15897	0.189165	0.197158	0.136767
T.fasciatus quadrimaculatus	F	0.038	11.33	0.279788	0.52692	0.282436	0.180936	0.148279	0.183583	0.191527	0.141218
T.fasciatus quadrimaculatus	F	0.037	11.35	0.284581	0.545374	0.290749	0.180617	0.13304	0.191189	0.196476	0.130396
T.fasciatus quadrimaculatus	M	0.038	10.97	0.268915	0.515041	0.285324	0.180492	0.163172	0.179581	0.211486	0.142206
T.fasciatus quadrimaculatus	F	0.033	11.46	0.274869	0.538394	0.280105	0.178883	0.143106	0.179756	0.191972	0.138743
T.fasciatus quadrimaculatus	M	0.046	11.65	0.266953	0.503004	0.277253	0.187124	0.170815	0.188841	0.188841	0.137339
T.fasciatus quadrimaculatus	F	0.05	11.94	0.296482	0.533501	0.273869	0.173367	0.157454	0.181742	0.179229	0.127303
T.fasciatus quadrimaculatus	M	0.042	11.18	0.277281	0.529517	0.282648	0.194097	0.146691	0.190519	0.206619	0.133274
T.fasciatus quadrimaculatus	F	0.056	12.2	0.281967	0.534426	0.281148	0.184426	0.138525	0.183607	0.195082	0.143443
T.fasciatus quadrimaculatus	F	0.037	11.34	0.292769	0.540564	0.292769	0.186067	0.150794	0.18254	0.184303	0.126102
T.fasciatus quadrimaculatus	F	0.043	11.27	0.338953	0.540373	0.284827	0.181012	0.141083	0.187223	0.191659	0.131322
T.fasciatus quadrimaculatus	F	0.036	11.41	0.282209	0.531113	0.283961	0.175285	0.172656	0.173532	0.174408	0.122699
T.fasciatus quadrimaculatus	M	0.03	10.48	0.293893	0.479962	0.299618	0.200382	0.158397	0.198473	0.214695	0.163168
T.fasciatus quadrimaculatus	M	0.037	11.61	0.268734	0.516796	0.273902	0.180017	0.166236	0.184324	0.18863	0.132644
T.fasciatus quadrimaculatus	F	0.048	11.77	0.316058	0.537808	0.282073	0.182668	0.146134	0.184367	0.191164	0.131691
T.fasciatus quadrimaculatus	M	0.048	12.03	0.27182	0.520366	0.280964	0.182876	0.167914	0.182045	0.200333	0.129676
T.fasciatus quadrimaculatus	F	0.049	11.55	0.296104	0.545455	0.287446	0.187013	0.130736	0.182684	0.193074	0.141126
T.fasciatus quadrimaculatus	F	0.052	12.3	0.282927	0.519512	0.281301	0.192683	0.152846	0.186179	0.194309	0.141463
T.fasciatus quadrimaculatus	M	0.041	11.28	0.281028	0.521277	0.279255	0.189716	0.161348	0.18883	0.191489	0.128546
T.fasciatus quadrimaculatus	M	0.043	11.32	0.272085	0.531802	0.280919	0.185512	0.160777	0.181095	0.181095	0.126325
T.fasciatus quadrimaculatus	M	0.041	10.93	0.336688	0.529735	0.287283	0.182983	0.141812	0.186642	0.196706	0.141812
T.fasciatus quadrimaculatus	M	0.038	11.24	0.335409	0.510676	0.287367	0.185943	0.147687	0.196619	0.206406	0.145018
T.fasciatus quadrimaculatus	M	0.027	11.77	0.28972	0.514019	0.255735	0.17672	0.15633	0.187766	0.191164	0.141886
T.fasciatus quadrimaculatus	M	0.041	11.45	0.281223	0.531878	0.279476	0.185153	0.145852	0.181659	0.18952	0.140611
T.fasciatus quadrimaculatus	M	0.044	11.55	0.311688	0.521212	0.275325	0.181818	0.15671	0.18961	0.193074	0.132468
T.fasciatus quadrimaculatus	M	0.038	11.1	0.302703	0.532432	0.293694	0.192793	0.14955	0.19009	0.176577	0.127928
T.fasciatus quadrimaculatus	M	0.042	11.09	0.286745	0.519387	0.300271	0.197475	0.151488	0.19477	0.190261	0.134355
T.fasciatus quadrimaculatus	F	0.033	10.42	0.302303	0.52975	0.287908	0.177543	0.142994	0.18714	0.192898	0.140115
T.fasciatus quadrimaculatus	F	0.04	11.74	0.264906	0.501704	0.270869	0.17632	0.140545	0.172913	0.124361	0.184838
T.fasciatus quadrimaculatus	M	0.04	10.94	0.279707	0.522852	0.285192	0.191956	0.144424	0.189214	0.191042	0.14351
T.fasciatus quadrimaculatus	F	0.038	10.79	0.34291	0.53012	0.287303	0.185357	0.1557	0.18721	0.176089	0.126969
T.fasciatus quadrimaculatus	M	0.04	11.14	0.260323	0.509874	0.283662	0.185817	0.153501	0.189408	0.211849	0.147217
T.fasciatus quadrimaculatus	M	0.041	11.21	0.286351	0.513827	0.282783	0.188225	0.166815	0.184657	0.191793	0.134701
T.fasciatus quadrimaculatus	M	0.028	9.86	0.274848	0.521298	0.295132	0.184584	0.168357	0.184584	0.180527	0.125761
T.fasciatus quadrimaculatus	M	0.044	11.51	0.266725	0.507385	0.283232	0.183319	0.170287	0.190269	0.173762	0.132059
T.fasciatus quadrimaculatus	M	0.034	10.91	0.27681	0.501375	0.272227	0.184235	0.209899	0.175069	0.182401	0.113657
T.fasciatus quadrimaculatus	M	0.038	10.91	0.27956	0.517874	0.28231	0.183318	0.159487	0.180568	0.203483	0.142071
T.fasciatus quadrimaculatus	M	0.045	11.9	0.270588	0.518487	0.273109	0.172269	0.156303	0.178992	0.202521	0.146218
T.fasciatus quadrimaculatus	M	0.039	11.36	0.274648	0.53257	0.274648	0.184859	0.144366	0.181338	0.197183	0.141725
T.fasciatus quadrimaculatus	M	0.04	11.31	0.276746	0.51901	0.27763	0.180371	0.155614	0.183024	0.196286	0.142352
T.fasciatus quadrimaculatus	M	0.044	11.46	0.289703	0.521815	0.284468	0.186736	0.166667	0.183246	0.17801	0.128272
T.fasciatus quadrimaculatus	F	0.037	10.95	0.281279	0.523288	0.283105	0.176256	0.152511	0.188128	0.188128	0.136073
T.fasciatus quadrimaculatus	F	0.032	10.21	0.286974	0.536729	0.284035	0.178257	0.143976	0.186092	0.179236	0.133203
T.fasciatus quadrimaculatus	M	0.04	11.27	0.272405	0.514641	0.278616	0.182786	0.159716	0.187223	0.191659	0.138421
T.fasciatus quadrimaculatus	M	0.038	11.3	0.261947	0.515044	0.283186	0.182301	0.151327	0.19115	0.195575	0.142478
T.fasciatus quadrimaculatus	M	0.042	10.82	0.278189	0.512015	0.288355	0.185767	0.149723	0.193161	0.198706	0.145102
T.fasciatus quadrimaculatus	F	0.042	11.51	0.287576	0.535187	0.279757	0.183319	0.138141	0.184188	0.195482	0.142485
T.fasciatus quadrimaculatus	F	0.043	11.35	0.276652	0.530396	0.287225	0.178855	0.153304	0.18326	0.18326	0.13304
T.fasciatus quadrimaculatus	F	0.044	11.46	0.287086	0.531414	0.287958	0.184119	0.140489	0.19459	0.19459	0.133508
T.fasciatus quadrimaculatus	M	0.038	11.11	0.278128	0.516652	0.281728	0.188119	0.153915	0.189019	0.190819	0.140414
T.fasciatus quadrimaculatus	M	0.018	10.39	0.26949	0.53128	0.289702	0.18768	0.139557	0.192493	0.196343	0.13667
T.fasciatus quadrimaculatus	F	0.043	11.2	0.28125	0.533929	0.286607	0.185714	0.140179	0.191071	0.197321	0.134821
T.fasciatus quadrimaculatus	M	0.034	11.17	0.282901	0.513876	0.282901	0.190689	0.15667	0.190689	0.197851	0.138765
T.fasciatus quadrimaculatus	F	0.038	11.54	0.284229	0.532929	0.279029	0.181976	0.15078	0.188042	0.170711	0.12825
T.fasciatus quadrimaculatus	M	0.053	12.13	0.283594	0.546579	0.287716	0.197032	0.131904	0.194559	0.185491	0.126958
T.fasciatus quadrimaculatus	M	0.043	11.25	0.279111	0.521778	0.284444	0.189333	0.154667	0.192889	0.178667	0.130667
T.fasciatus quadrimaculatus	M	0.033	10.26	0.320663	0.531189	0.288499	0.192008	0.14425	0.192008	0.204678	0.132554
T.fasciatus quadrimaculatus	F	0.039	11.22	0.279857	0.530303	0.283422	0.177362	0.156863	0.178253	0.187166	0.134581
T.fasciatus quadrimaculatus	M	0.044	11.09	0.281335	0.530207	0.28404	0.187556	0.150586	0.182146	0.202885	0.13706
T.fasciatus quadrimaculatus	M	0.047	11.62	0.276248	0.522375	0.277969	0.184165	0.156627	0.186747	0.183305	0.134251
T.fasciatus quadrimaculatus	M	0.045	11.26	0.319716	0.515098	0.291297	0.198046	0.135879	0.205151	0.203375	0.143872
T.fasciatus quadrimaculatus	M	0.032	11.03	0.278332	0.537625	0.286491	0.194923	0.159565	0.164098	0.199456	0.138713
T.fasciatus quadrimaculatus	M	0.042	10.54	0.33112	0.518975	0.297913	0.193548	0.134725	0.191651	0.216319	0.154649
T.fasciatus quadrimaculatus	F	0.034	10.68	0.292135	0.543071	0.289326	0.178839	0.146067	0.175094	0.191948	0.135768
T.fasciatus quadrimaculatus	F	0.036	10.75	0.285581	0.524651	0.284651	0.186047	0.150698	0.19814	0.190698	0.126512
T.fasciatus quadrimaculatus	F	0.038	10.76	0.282528	0.530669	0.288104	0.183086	0.16171	0.178439	0.184944	0.129182
T.fasciatus quadrimaculatus	M	0.04	11.48	0.272648	0.513937	0.284843	0.191638	0.173345	0.187282	0.190767	0.125436
T.fasciatus quadrimaculatus	M	0.044	11.53	0.284475	0.516045	0.278404	0.191674	0.148309	0.191674	0.190807	0.143972
T.fasciatus quadrimaculatus	F	0.035	11.1	0.277477	0.522523	0.265766	0.179279	0.154054	0.187387	0.182883	0.136036
T.fasciatus quadrimaculatus	M	0.038	11.1	0.275676	0.515315	0.279279	0.187387	0.151351	0.187387	0.212613	0.145946
T.fasciatus quadrimaculatus	M	0.037	10.54	0.328273	0.525617	0.285579	0.186907	0.157495	0.186907	0.188805	0.129981
T.fasciatus quadrimaculatus	M	0.038	10.85	0.275576	0.535484	0.284793	0.184332	0.129954	0.18894	0.191705	0.145622
T.fasciatus quadrimaculatus	M	0.041	11.32	0.275618	0.526502	0.278269	0.178445	0.155477	0.182862	0.181979	0.135159
T.fasciatus quadrimaculatus	F	0.028	10.56	0.28125	0.535038	0.288826	0.178977	0.142045	0.186553	0.193182	0.136364
T.fasciatus quadrimaculatus	M	0.033	10.59	0.274788	0.522191	0.29084	0.182247	0.149197	0.189802	0.200189	0.13881
T.fasciatus quadrimaculatus	M	0.051	11.96	0.273411	0.519231	0.280936	0.190635	0.15301	0.190635	0.195652	0.137124
T.fasciatus quadrimaculatus	M	0.047	11.64	0.262887	0.524055	0.277491	0.180412	0.146048	0.180412	0.204467	0.149485
T.fasciatus quadrimaculatus	M	0.044	11.24	0.328292	0.517794	0.287367	0.19306	0.152135	0.191281	0.209964	0.13879
T.fasciatus quadrimaculatus	M	0.032	10.21	0.280118	0.523017	0.29383	0.190989	0.144956	0.195886	0.193928	0.136141
T.fasciatus quadrimaculatus	M	0.039	10.61	0.283695	0.522149	0.298775	0.196984	0.137606	0.194156	0.180961	0.146089
T.fasciatus quadrimaculatus	F	0.031	9.95	0.283417	0.529648	0.285427	0.18191	0.148744	0.179899	0.2	0.141709
T.fasciatus quadrimaculatus	M	0.038	11.1	0.281982	0.518919	0.281982	0.194595	0.154054	0.190991	0.200901	0.136036
T.fasciatus quadrimaculatus	F	0.041	11.17	0.285586	0.525515	0.283796	0.188899	0.14145	0.195166	0.208594	0.137869
T.fasciatus quadrimaculatus	M	0.04	11.19	0.28597	0.516533	0.286863	0.196604	0.134048	0.190349	0.217158	0.159071
T.fasciatus quadrimaculatus	M	0.029	11.29	0.268379	0.510186	0.272808	0.179805	0.165633	0.186005	0.19752	0.138175
T.fasciatus quadrimaculatus	M	0.038	11.02	0.271325	0.519056	0.272232	0.189655	0.168784	0.188748	0.165154	0.123412
T.fasciatus quadrimaculatus	M	0.052	11.97	0.283208	0.518797	0.283208	0.193818	0.149541	0.191312	0.196324	0.140351
T.fasciatus quadrimaculatus	F	0.036	10.88	0.287684	0.528493	0.285846	0.181066	0.152574	0.17739	0.19761	0.141544
T.fasciatus quadrimaculatus	F	0.038	10.33	0.31365	0.538238	0.296225	0.18393	0.14908	0.182962	0.188771	0.129719
T.fasciatus quadrimaculatus	M	0.05	11.52	0.290799	0.52691	0.283854	0.189236	0.139757	0.196181	0.197049	0.137153
T.fasciatus quadrimaculatus	F	0.035	11.24	0.286477	0.538256	0.279359	0.185943	0.153025	0.179715	0.196619	0.129004
T.fasciatus quadrimaculatus	F	0.036	11.54	0.287695	0.533795	0.281629	0.183709	0.143847	0.181976	0.199307	0.140381
T.fasciatus quadrimaculatus	F	0.029	11.26	0.276199	0.530195	0.284192	0.170515	0.155417	0.184725	0.186501	0.129663
T.fasciatus quadrimaculatus	M	0.033	10.95	0.281279	0.547945	0.300457	0.191781	0.13242	0.192694	0.200913	0.126941
T.fasciatus quadrimaculatus	F	0.047	11.17	0.322292	0.535363	0.288272	0.178156	0.140555	0.181737	0.196956	0.142346
T.fasciatus quadrimaculatus	M	0.029	11.11	0.288029	0.525653	0.282628	0.188119	0.144014	0.185419	0.19802	0.144914
T.fasciatus quadrimaculatus	M	0.042	11.33	0.269197	0.516328	0.288614	0.188879	0.15534	0.194175	0.194175	0.134157
T.fasciatus quadrimaculatus	M	0.028	10.62	0.280603	0.512241	0.283427	0.183616	0.154426	0.190207	0.193974	0.143126
T.fasciatus quadrimaculatus	M	0.042	11.42	0.335377	0.525394	0.282837	0.180385	0.144483	0.192644	0.19352	0.137478
T.fasciatus quadrimaculatus	F	0.022	10.19	0.31894	0.547596	0.300294	0.186457	0.135427	0.175662	0.20314	0.141315
T.fasciatus quadrimaculatus	M	0.039	11.23	0.273375	0.524488	0.280499	0.195013	0.15138	0.18789	0.194123	0.136242
T.fasciatus quadrimaculatus	M	0.041	11.18	0.278175	0.529517	0.280859	0.189624	0.142218	0.18873	0.214669	0.139535
T.fasciatus quadrimaculatus	M	0.036	10.71	0.286648	0.531279	0.285714	0.18394	0.142857	0.187675	0.203548	0.138189
T.fasciatus quadrimaculatus	M	0.04	11.33	0.275375	0.535746	0.282436	0.184466	0.141218	0.178288	0.202118	0.144748
T.fasciatus quadrimaculatus	F	0.043	11.16	0.280466	0.543907	0.28853	0.177419	0.132616	0.189068	0.195341	0.134409
T.fasciatus quadrimaculatus	M	0.052	13.26	0.251131	0.487179	0.260181	0.177225	0.205128	0.171192	0.180995	0.136501
T.fasciatus quadrimaculatus	M	0.041	11.28	0.266844	0.54078	0.197695	0.185284	0.146277	0.184397	0.177305	0.128546
T.fasciatus quadrimaculatus	F	0.049	11.41	0.283085	0.54163	0.284838	0.182296	0.145486	0.183173	0.186678	0.129711
T.fasciatus quadrimaculatus	M	0.04	11.2	0.271429	0.510714	0.28125	0.18125	0.160714	0.19375	0.194643	0.134821
T.fasciatus quadrimaculatus	M	0.037	10.85	0.282028	0.537327	0.290323	0.181567	0.15023	0.18341	0.196313	0.129032
T.fasciatus quadrimaculatus	F	0.027	10.66	0.321764	0.535647	0.292683	0.186679	0.142589	0.181051	0.202627	0.140713
T.fasciatus quadrimaculatus	M	0.048	11.96	0.277592	0.527592	0.276756	0.19398	0.142977	0.188963	0.204849	0.140468
T.fasciatus quadrimaculatus	M	0.038	11.33	0.270079	0.518094	0.282436	0.187996	0.154457	0.185349	0.209179	0.142101
T.fasciatus quadrimaculatus	M	0.029	9.86	0.286004	0.526369	0.271805	0.184584	0.150101	0.189655	0.191684	0.133874
T.fasciatus quadrimaculatus	F	0.048	11.48	0.281359	0.531359	0.283101	0.189024	0.149826	0.184669	0.191638	0.134146
T.fasciatus quadrimaculatus	F	0.037	10.68	0.285581	0.546816	0.277154	0.176966	0.13015	0.183521	0.201311	0.139513
T.fasciatus quadrimaculatus	F	0.051	11.73	0.282182	0.538789	0.293265	0.184143	0.138107	0.184143	0.198636	0.13896
T.fasciatus quadrimaculatus	M	0.031	9.78	0.287321	0.531697	0.302658	0.192229	0.150307	0.171779	0.224949	0.146217
T.fasciatus quadrimaculatus	M	0.046	11.72	0.274744	0.524744	0.267065	0.188567	0.151877	0.202218	0.188567	0.12116
T.fasciatus quadrimaculatus	M	0.042	11.36	0.3125	0.509683	0.28169	0.18662	0.154049	0.18662	0.212148	0.149648
T.fasciatus quadrimaculatus	M	0.032	10.37	0.358727	0.514947	0.288332	0.189971	0.150434	0.196721	0.187078	0.137898
T.fasciatus quadrimaculatus	M	0.039	10.84	0.351476	0.51845	0.296125	0.191882	0.153137	0.189114	0.198339	0.139299
T.fasciatus quadrimaculatus	F	0.039	11.42	0.309107	0.543783	0.294221	0.184764	0.140981	0.176007	0.209282	0.139229
T.fasciatus quadrimaculatus	M	0.029	11.05	0.270588	0.541176	0.280543	0.177376	0.133032	0.18009	0.182805	0.145701
T.fasciatus quadrimaculatus	M	0.028	10.89	0.28191	0.513315	0.284665	0.178145	0.160698	0.178145	0.202938	0.147842
T.fasciatus quadrimaculatus	M	0.042	11.8	0.29322	0.527119	0.273729	0.180508	0.14661	0.177966	0.20339	0.148305
T.fasciatus quadrimaculatus	F	0.036	10.71	0.27451	0.532213	0.278245	0.174603	0.141923	0.183007	0.197946	0.142857
T.fasciatus quadrimaculatus	F	0.024	10.33	0.287512	0.549855	0.28848	0.184898	0.127783	0.180058	0.211036	0.142304
T.fasciatus quadrimaculatus	F	0.036	10.66	0.285178	0.515947	0.286116	0.181051	0.153846	0.190432	0.19137	0.139775
T.fasciatus quadrimaculatus	F	0.044	11.93	0.282481	0.523051	0.263202	0.178541	0.157586	0.170159	0.171836	0.149204
T.fasciatus quadrimaculatus	M	0.049	12.09	0.26799	0.509512	0.278743	0.186104	0.154673	0.187758	0.205128	0.148056
T.fasciatus quadrimaculatus	M	0.041	11.27	0.267968	0.50488	0.28039	0.182786	0.157941	0.187223	0.188997	0.149956
T.fasciatus quadrimaculatus	F	0.035	11.27	0.281278	0.528838	0.266193	0.176575	0.137533	0.181899	0.191659	0.15173
T.fasciatus quadrimaculatus	M	0.038	10.94	0.278793	0.52468	0.28702	0.194698	0.151737	0.1883	0.191042	0.135283
T.fasciatus quadrimaculatus	M	0.03	10.8	0.287963	0.526852	0.281481	0.190741	0.142593	0.183333	0.2	0.147222
T.fasciatus quadrimaculatus	M	0.036	10.73	0.33178	0.522833	0.28425	0.193849	0.142591	0.181733	0.212488	0.152842
T.fasciatus quadrimaculatus	M	0.047	11.6	0.273276	0.506034	0.284483	0.188793	0.150862	0.193103	0.191379	0.15
T.fasciatus quadrimaculatus	M	0.05	12.37	0.296686	0.519806	0.271625	0.189167	0.143088	0.185934	0.196443	0.151172
T.fasciatus quadrimaculatus	M	0.034	10.85	0.281106	0.521659	0.284793	0.186175	0.152995	0.182488	0.190783	0.142857
T.fasciatus quadrimaculatus	M	0.034	10.35	0.279227	0.498551	0.282126	0.192271	0.157488	0.193237	0.203865	0.150725
T.fasciatus quadrimaculatus	F	0.032	10.71	0.278245	0.52381	0.283847	0.179272	0.143791	0.18394	0.188609	0.148459
T.fasciatus quadrimaculatus	M	0.047	11.67	0.287061	0.51928	0.283633	0.188518	0.155099	0.187661	0.203085	0.137961
T.fasciatus quadrimaculatus	F	0.042	11.04	0.307065	0.519022	0.290761	0.182065	0.143116	0.189312	0.191123	0.148551
T.fasciatus quadrimaculatus	M	0.023	11.04	0.258152	0.513587	0.269022	0.171196	0.172101	0.178442	0.192029	0.13587
T.fasciatus quadrimaculatus	M	0.057	12.3	0.273984	0.51626	0.270732	0.178049	0.164228	0.176423	0.197561	0.143089
T.fasciatus quadrimaculatus	F	0.036	11.42	0.284588	0.530648	0.279335	0.180385	0.15324	0.182137	0.194396	0.133975
T.fasciatus quadrimaculatus	M	0.049	11.96	0.266722	0.510033	0.27592	0.179766	0.159699	0.188127	0.216555	0.14214
T.fasciatus quadrimaculatus	M	0.046	11.86	0.280776	0.514334	0.27656	0.177066	0.148398	0.184654	0.201518	0.152614
T.fasciatus quadrimaculatus	M	0.041	11.22	0.27451	0.523173	0.279857	0.180927	0.155971	0.183601	0.2041	0.137255
T.fasciatus quadrimaculatus	M	0.044	11.25	0.278222	0.515556	0.291556	0.186667	0.154667	0.188444	0.217778	0.141333
T.fasciatus quadrimaculatus	F	0.044	11.38	0.279438	0.516696	0.27768	0.181019	0.164323	0.178383	0.202109	0.140598
T.fasciatus quadrimaculatus	M	0.039	10.97	0.314494	0.515041	0.286235	0.189608	0.148587	0.192343	0.211486	0.144029
T.fasciatus quadrimaculatus	M	0.026	11.17	0.290958	0.520143	0.278424	0.179051	0.162936	0.188004	0.179051	0.128917
T.fasciatus quadrimaculatus	F	0.023	11.51	0.271937	0.51086	0.271069	0.16768	0.203301	0.169418	0.16073	0.116421
T.fasciatus quadrimaculatus	F	0.029	10.31	0.332687	0.535403	0.29098	0.178468	0.1387	0.185257	0.196896	0.14064
T.fasciatus quadrimaculatus	M	0.04	10.94	0.310786	0.515539	0.28702	0.1883	0.158135	0.184644	0.206581	0.141682
T.fasciatus quadrimaculatus	M	0.034	10.35	0.314976	0.521739	0.298551	0.191304	0.144928	0.192271	0.21256	0.141063
T.fasciatus quadrimaculatus	M	0.046	11.52	0.27691	0.520833	0.28559	0.185764	0.157118	0.184028	0.210069	0.138021
T.fasciatus quadrimaculatus	M	0.035	10.79	0.363299	0.539388	0.285449	0.189991	0.145505	0.185357	0.196478	0.12975
T.fasciatus quadrimaculatus	M	0.046	11.62	0.27883	0.505164	0.286575	0.202238	0.162651	0.198795	0.203959	0.133391
T.fasciatus quadrimaculatus	M	0.047	11.63	0.272571	0.506449	0.27945	0.200344	0.151333	0.200344	0.210662	0.141874
T.fasciatus quadrimaculatus	M	0.045	11.28	0.337766	0.514184	0.289894	0.193262	0.149823	0.196809	0.18883	0.139184
T.fasciatus quadrimaculatus	M	0.046	12.08	0.274834	0.530629	0.283113	0.194536	0.139073	0.191225	0.215232	0.139073
T.fasciatus quadrimaculatus	F	0.035	10.88	0.330882	0.538603	0.285846	0.190257	0.142463	0.190257	0.195772	0.128676
T.fasciatus quadrimaculatus	M	0.036	10.38	0.331407	0.514451	0.295761	0.200385	0.159923	0.194605	0.189788	0.131021
T.fasciatus quadrimaculatus	F	0.039	11.9	0.280672	0.540336	0.27563	0.179832	0.137815	0.186555	0.192437	0.135294
T.fasciatus quadrimaculatus	M	0.058	13.04	0.282975	0.529141	0.27684	0.18865	0.151074	0.189417	0.184816	0.130368
T.fasciatus quadrimaculatus	M	0.04	11.14	0.339318	0.531418	0.29982	0.195691	0.154399	0.191203	0.17684	0.12298
T.fasciatus quadrimaculatus	F	0.051	12.01	0.286428	0.525396	0.278102	0.180683	0.159034	0.184013	0.203997	0.131557
T.fasciatus quadrimaculatus	M	0.032	10.05	0.330348	0.528358	0.293532	0.177114	0.151244	0.187065	0.21592	0.133333
T.fasciatus quadrimaculatus	F	0.045	11.41	0.287467	0.539877	0.286591	0.185802	0.140228	0.187555	0.186678	0.13234
T.fasciatus quadrimaculatus	F	0.038	11.35	0.300441	0.546256	0.287225	0.179736	0.126872	0.187665	0.204405	0.139207
T.fasciatus quadrimaculatus	M	0.048	12.26	0.256933	0.506525	0.267537	0.181892	0.175367	0.179445	0.194943	0.138662
T.fasciatus quadrimaculatus	M	0.046	11.63	0.27601	0.508169	0.273431	0.183147	0.16853	0.188306	0.204643	0.134996
T.fasciatus quadrimaculatus	M	0.044	11.84	0.266047	0.526182	0.275338	0.184966	0.16723	0.173142	0.186655	0.133446
T.fasciatus quadrimaculatus	M	0.045	11.72	0.275597	0.533276	0.27901	0.185154	0.151024	0.183447	0.195392	0.132253
T.fasciatus quadrimaculatus	M	0.045	11.48	0.316202	0.528746	0.28223	0.195122	0.152439	0.188153	0.189024	0.130662
T.fasciatus quadrimaculatus	M	0.044	11.52	0.284722	0.515625	0.286458	0.194444	0.158854	0.185764	0.197917	0.139757
T.fasciatus quadrimaculatus	F	0.04	11.68	0.285103	0.544521	0.275685	0.185788	0.142123	0.179795	0.206336	0.133562
T.fasciatus quadrimaculatus	F	0.055	12.1	0.302479	0.539669	0.284298	0.186777	0.15124	0.180165	0.2	0.128926
T.fasciatus quadrimaculatus	F	0.035	10.91	0.311641	0.545371	0.278643	0.179652	0.144821	0.179652	0.175985	0.130156
T.fasciatus quadrimaculatus	M	0.027	10.38	0.286127	0.528902	0.299615	0.191715	0.136802	0.182081	0.2158	0.152216
T.fasciatus quadrimaculatus	M	0.042	11.35	0.274009	0.522467	0.274009	0.191189	0.151542	0.191189	0.185022	0.134802
T.fasciatus quadrimaculatus	M	0.041	11.58	0.270294	0.51209	0.280656	0.189983	0.159758	0.181347	0.208981	0.146805
T.fasciatus quadrimaculatus	M	0.056	12.57	0.273667	0.504375	0.270485	0.191726	0.161496	0.192522	0.207637	0.141607
T.fasciatus quadrimaculatus	M	0.045	10.54	0.298861	0.519924	0.312144	0.201139	0.135674	0.194497	0.218216	0.149905
T.fasciatus quadrimaculatus	M	0.04	11.5	0.272174	0.509565	0.276522	0.184348	0.177391	0.175652	0.210435	0.137391
T.fasciatus quadrimaculatus	F	0.045	11.68	0.294521	0.535959	0.277397	0.182363	0.152397	0.182363	0.191781	0.129281
T.fasciatus quadrimaculatus	M	0.049	11.93	0.279966	0.511316	0.255658	0.192791	0.157586	0.184409	0.209556	0.146689
T.fasciatus quadrimaculatus	M	0.05	12.18	0.275862	0.531199	0.275862	0.188013	0.146141	0.186371	0.197044	0.136289
T.fasciatus pseudolatreillei	M	0.051	12.58	0.263911	0.515898	0.274245	0.18442	0.155008	0.178855	0.207472	0.150238
T.fasciatus pseudolatreillei	M	0.04	11.44	0.27535	0.542832	0.273601	0.181818	0.138986	0.177448	0.186189	0.140734
T.fasciatus pseudolatreillei	M	0.058	12.49	0.270616	0.536429	0.265012	0.183347	0.144115	0.178543	0.20016	0.140913
T.fasciatus pseudolatreillei	F	0.033	12.98	0.27812	0.532357	0.264253	0.171803	0.16641	0.162558	0.188752	0.138675
T.fasciatus pseudolatreillei	M	0.053	12.42	0.269726	0.529791	0.268116	0.188406	0.158615	0.180354	0.186795	0.13124
T.fasciatus pseudolatreillei	M	0.04	10.86	0.326888	0.538674	0.289134	0.188766	0.139042	0.190608	0.188766	0.131676
T.fasciatus pseudolatreillei	M	0.042	11.48	0.279617	0.527003	0.277003	0.180314	0.160279	0.184669	0.179443	0.128049
T.fasciatus pseudolatreillei	M	0.041	11.02	0.284936	0.519056	0.280399	0.193285	0.153358	0.184211	0.206897	0.143376
T.fasciatus pseudolatreillei	F	0.036	11.72	0.291809	0.536689	0.27901	0.18686	0.148464	0.186007	0.19198	0.12884
T.fasciatus pseudolatreillei	M	0.045	11.66	0.279588	0.528302	0.280446	0.188679	0.170669	0.17753	0.183533	0.123499
T.fasciatus pseudolatreillei	M	0.044	11.7	0.288889	0.515385	0.269231	0.180342	0.155556	0.187179	0.197436	0.14188
T.fasciatus pseudolatreillei	M	0.048	12.12	0.279703	0.520627	0.273927	0.174917	0.157591	0.183168	0.200495	0.138614
T.fasciatus pseudolatreillei	F	0.051	11.88	0.294613	0.51936	0.284512	0.179293	0.153199	0.18771	0.183502	0.139731
T.fasciatus pseudolatreillei	F	0.037	10.04	0.327689	0.550797	0.292829	0.194223	0.13247	0.12749	0.184263	0.12749
T.fasciatus pseudolatreillei	M	0.044	11.19	0.27882	0.519214	0.280608	0.188561	0.16622	0.179625	0.201966	0.134942
T.fasciatus pseudolatreillei	M	0.05	12.04	0.273256	0.520764	0.2799	0.179402	0.151993	0.189369	0.199336	0.137874
T.fasciatus pseudolatreillei	M	0.056	12.18	0.289819	0.525452	0.287356	0.19376	0.14532	0.188013	0.203612	0.141215
T.fasciatus pseudolatreillei	F	0.044	11.35	0.285463	0.535683	0.2837	0.176211	0.155947	0.176211	0.2	0.132159
T.fasciatus pseudolatreillei	M	0.037	10.65	0.323005	0.517371	0.284507	0.187793	0.149296	0.193427	0.221596	0.139906
T.fasciatus pseudolatreillei	M	0.037	10.46	0.303059	0.515296	0.273423	0.186424	0.154876	0.190249	0.214149	0.139579
T.fasciatus pseudolatreillei	M	0.039	11.16	0.271505	0.52957	0.271505	0.179211	0.149642	0.187276	0.198925	0.133513
T.fasciatus pseudolatreillei	M	0.04	11.73	0.266837	0.526002	0.262575	0.179881	0.156863	0.183291	0.180733	0.133845
T.fasciatus pseudolatreillei	M	0.041	11.01	0.284287	0.527702	0.281562	0.185286	0.153497	0.18347	0.203451	0.135332
T.fasciatus pseudolatreillei	F	0.051	12.05	0.297925	0.53278	0.286307	0.183402	0.136929	0.190041	0.20166	0.140249
T.fasciatus pseudolatreillei	M	0.044	11.96	0.279264	0.529264	0.268395	0.180602	0.146321	0.191472	0.184783	0.132943
T.fasciatus pseudolatreillei	F	0.046	12	0.286667	0.5525	0.280833	0.185833	0.134167	0.1775	0.198333	0.135833
T.fasciatus pseudolatreillei	M	0.034	11.61	0.309216	0.551249	0.275624	0.171404	0.148148	0.175711	0.177433	0.124892
T.fasciatus pseudolatreillei	M	0.048	12.34	0.28201	0.511345	0.273096	0.179903	0.163695	0.192058	0.193679	0.132901
T.fasciatus pseudolatreillei	M	0.043	11.33	0.282436	0.52692	0.280671	0.189762	0.157105	0.190644	0.190644	0.125331
T.fasciatus pseudolatreillei	M	0.048	11.99	0.268557	0.52377	0.278565	0.178482	0.155129	0.18849	0.179316	0.132611
T.fasciatus pseudolatreillei	M	0.047	11.87	0.26369	0.519798	0.273799	0.177759	0.163437	0.181971	0.191238	0.134794
T.fasciatus pseudolatreillei	M	0.046	11.6	0.280172	0.518966	0.27931	0.188793	0.153448	0.187931	0.209483	0.139655
T.fasciatus pseudolatreillei	M	0.039	11.24	0.269573	0.512456	0.279359	0.175267	0.176157	0.177046	0.198399	0.134342
T.fasciatus pseudolatreillei	M	0.043	11.67	0.276778	0.532134	0.257926	0.180805	0.149957	0.18509	0.184233	0.132819
T.fasciatus pseudolatreillei	M	0.049	11.98	0.277129	0.533389	0.280467	0.181135	0.148581	0.184474	0.19783	0.133556
T.fasciatus pseudolatreillei	M	0.034	10.64	0.272556	0.519737	0.275376	0.180451	0.161654	0.183271	0.195489	0.135338
T.fasciatus pseudolatreillei	M	0.045	11.86	0.288364	0.514334	0.263069	0.180438	0.161889	0.183811	0.193086	0.139966
T.fasciatus pseudolatreillei	M	0.039	10.71	0.293184	0.546218	0.278245	0.189542	0.145658	0.186741	0.193277	0.121382
T.fasciatus pseudolatreillei	F	0.056	11.8	0.294915	0.537288	0.280508	0.182203	0.15678	0.186441	0.187288	0.119492
T.fasciatus pseudolatreillei	F	0.05	11.64	0.294674	0.524914	0.281787	0.179553	0.152921	0.185567	0.20189	0.136598
T.fasciatus pseudolatreillei	M	0.048	11.58	0.282383	0.527634	0.276339	0.187392	0.151123	0.184801	0.190846	0.136442
T.fasciatus pseudolatreillei	M	0.041	11.22	0.273619	0.52852	0.280749	0.179144	0.156863	0.179144	0.187166	0.135472
T.fasciatus pseudolatreillei	M	0.045	11.7	0.276068	0.528205	0.280342	0.184615	0.150427	0.182051	0.206838	0.139316
T.fasciatus pseudolatreillei	M	0.047	11.9	0.27563	0.540336	0.278151	0.17563	0.14958	0.180672	0.19916	0.129412
T.fasciatus pseudolatreillei	M	0.044	11.24	0.289146	0.52847	0.291815	0.186833	0.158363	0.184164	0.197509	0.129004
T.fasciatus pseudolatreillei	M	0.034	10.2	0.286275	0.523529	0.287255	0.190196	0.146078	0.186275	0.20098	0.144118
T.fasciatus pseudolatreillei	M	0.048	11.79	0.286684	0.531807	0.281595	0.186599	0.146735	0.183206	0.189992	0.138253
T.fasciatus pseudolatreillei	F	0.032	11.71	0.288642	0.53117	0.280102	0.185312	0.157131	0.181042	0.183604	0.130658
T.fasciatus pseudolatreillei	M	0.053	12.2	0.268852	0.527869	0.281967	0.184426	0.14918	0.186066	0.195082	0.136885
T.fasciatus pseudolatreillei	M	0.051	11.93	0.280805	0.523051	0.275775	0.192791	0.149204	0.187762	0.203688	0.139983
T.fasciatus pseudolatreillei	M	0.041	10.85	0.308756	0.520737	0.294009	0.186175	0.148387	0.188018	0.192627	0.142857
T.fasciatus pseudolatreillei	F	0.034	10.77	0.287837	0.545032	0.271123	0.175487	0.135562	0.182916	0.185701	0.13649
T.fasciatus pseudolatreillei	M	0.04	10.29	0.334305	0.5345	0.297376	0.199223	0.135083	0.197279	0.179786	0.133139
T.fasciatus pseudolatreillei	M	0.047	11.7	0.321368	0.531624	0.282051	0.18547	0.14359	0.188034	0.192308	0.136752
T.fasciatus pseudolatreillei	M	0.04	10.97	0.34093	0.52598	0.284412	0.18505	0.153145	0.185962	0.184139	0.134913
T.fasciatus pseudolatreillei	M	0.045	11.55	0.333333	0.52987	0.283117	0.184416	0.14026	0.195671	0.197403	0.134199
T.fasciatus pseudolatreillei	M	0.054	12.6	0.261905	0.528571	0.27381	0.186508	0.161905	0.17381	0.189683	0.135714
T.fasciatus pseudolatreillei	F	0.054	12.38	0.274637	0.533118	0.260097	0.175283	0.147011	0.178514	0.203554	0.141357
T.fasciatus pseudolatreillei	M	0.058	13.04	0.282975	0.52684	0.261503	0.185583	0.16181	0.180982	0.180215	0.130368
T.fasciatus pseudolatreillei	M	0.058	13.04	0.269939	0.523773	0.261503	0.180982	0.157975	0.177147	0.196319	0.141104
T.fasciatus pseudolatreillei	M	0.055	12.82	0.278471	0.525741	0.25741	0.180967	0.154446	0.178627	0.195788	0.141186
T.fasciatus pseudolatreillei	M	0.049	13.2	0.285606	0.519697	0.248485	0.169697	0.143939	0.167424	0.236364	0.168939
T.fasciatus pseudolatreillei	M	0.056	12.77	0.266249	0.540329	0.261551	0.174628	0.142522	0.176977	0.194988	0.140172
T.fasciatus pseudolatreillei	M	0.05	12.69	0.268716	0.518519	0.274232	0.178881	0.152876	0.182033	0.197006	0.146572
T.fasciatus pseudolatreillei	M	0.06	12.84	0.264019	0.541277	0.274922	0.185358	0.15109	0.173676	0.182243	0.133956
T.fasciatus pseudolatreillei	M	0.052	12.38	0.281906	0.542811	0.265751	0.180129	0.153473	0.172859	0.193861	0.130856
T.fasciatus pseudolatreillei	M	0.043	11.62	0.266781	0.528399	0.268503	0.179002	0.160929	0.172978	0.19105	0.137694
T.fasciatus pseudolatreillei	M	0.046	12.29	0.270138	0.536208	0.266884	0.16843	0.153784	0.170057	0.187144	0.139951
T.fasciatus pseudolatreillei	M	0.055	12.95	0.278764	0.538996	0.265637	0.179151	0.142857	0.177606	0.196139	0.140541
T.fasciatus pseudolatreillei	F	0.036	12.16	0.280428	0.556743	0.261513	0.169408	0.133224	0.17023	0.195724	0.139803
T.fasciatus pseudolatreillei	M	0.054	12.87	0.261849	0.525253	0.254079	0.175602	0.1554	0.175602	0.199689	0.143745
T.fasciatus pseudolatreillei	F	0.041	11.33	0.326567	0.562224	0.269197	0.171227	0.149162	0.169462	0.165049	0.119153
T.fasciatus pseudolatreillei	F	0.049	11.96	0.330268	0.552676	0.270067	0.179766	0.136288	0.173913	0.188963	0.137124
T.fasciatus pseudolatreillei	M	0.055	12.75	0.287059	0.540392	0.267451	0.181961	0.150588	0.176471	0.187451	0.132549
T.fasciatus pseudolatreillei	M	0.049	12.3	0.302439	0.54878	0.266667	0.179675	0.156911	0.169919	0.187805	0.12439
T.fasciatus pseudolatreillei	M	0.06	13.16	0.280395	0.530395	0.265198	0.178571	0.166413	0.177812	0.180091	0.12538
T.fasciatus pseudolatreillei	F	0.048	11.91	0.301427	0.553317	0.27372	0.173804	0.150294	0.170445	0.174643	0.125945
T.fasciatus pseudolatreillei	F	0.05	13.12	0.294207	0.541921	0.265244	0.177591	0.144817	0.177591	0.188262	0.135671
T.fasciatus pseudolatreillei	F	0.05	11.87	0.294019	0.552654	0.27043	0.166807	0.151643	0.16765	0.187869	0.128054
T.fasciatus pseudolatreillei	M	0.049	12.13	0.267931	0.530915	0.26958	0.180544	0.149217	0.182193	0.190437	0.137675
T.fasciatus pseudolatreillei	M	0.047	12.14	0.313015	0.551895	0.262768	0.182043	0.137562	0.172982	0.201812	0.137562
T.fasciatus pseudolatreillei	M	0.044	12.14	0.281713	0.54201	0.268534	0.172158	0.151565	0.169687	0.189456	0.136738
T.fasciatus pseudolatreillei	F	0.044	11.55	0.275325	0.538528	0.255411	0.172294	0.151515	0.170563	0.203463	0.139394
T.fasciatus pseudolatreillei	F	0.05	12.7	0.285039	0.554331	0.262992	0.171654	0.143307	0.173228	0.184252	0.129134
T.fasciatus pseudolatreillei	M	0.052	12.75	0.277647	0.536471	0.262745	0.181176	0.163137	0.170196	0.185882	0.130196
T.fasciatus pseudolatreillei	M	0.06	12.72	0.28066	0.524371	0.273585	0.180818	0.166667	0.171384	0.194182	0.137579
T.fasciatus pseudolatreillei	F	0.059	12.73	0.289866	0.538885	0.267086	0.17989	0.146897	0.168107	0.203456	0.146112
T.fasciatus pseudolatreillei	M	0.06	13.21	0.264951	0.532173	0.265708	0.181681	0.146858	0.181681	0.197578	0.139288
T.fasciatus pseudolatreillei	F	0.048	11.85	0.277637	0.550211	0.275105	0.178059	0.146835	0.166245	0.201688	0.136709
T.fasciatus pseudolatreillei	F	0.04	12.67	0.278611	0.557222	0.265193	0.168114	0.141279	0.17206	0.187845	0.12944
T.fasciatus pseudolatreillei	M	0.043	12.43	0.271118	0.526951	0.262269	0.1786	0.149638	0.177796	0.217216	0.145615
T.fasciatus pseudolatreillei	M	0.045	11.85	0.276793	0.540084	0.278481	0.183122	0.149367	0.180591	0.183966	0.129958
T.fasciatus pseudolatreillei	M	0.041	11.87	0.304971	0.551811	0.262005	0.175232	0.14743	0.165965	0.185341	0.134794
T.fasciatus pseudolatreillei	F	0.044	12.52	0.299521	0.555911	0.266773	0.17492	0.140575	0.167732	0.17492	0.135783
T.fasciatus pseudolatreillei	F	0.039	12.02	0.293677	0.539933	0.262895	0.166389	0.154742	0.164725	0.195507	0.140599
T.fasciatus pseudolatreillei	F	0.043	11.46	0.28185	0.541012	0.271379	0.17452	0.156195	0.163176	0.190227	0.139616
T.fasciatus pseudolatreillei	F	0.034	11.95	0.293724	0.556485	0.266946	0.167364	0.139749	0.166527	0.192469	0.137238
T.fasciatus pseudolatreillei	M	0.052	12.52	0.276358	0.529553	0.265974	0.18131	0.157348	0.171725	0.193291	0.141374
T.fasciatus pseudolatreillei	M	0.047	11.92	0.276007	0.527685	0.263423	0.181208	0.168624	0.170302	0.189597	0.133389
T.fasciatus pseudolatreillei	M	0.038	11.19	0.276139	0.52815	0.274352	0.183199	0.164433	0.175156	0.182306	0.132261
T.fasciatus pseudolatreillei	F	0.045	11.59	0.345125	0.559103	0.271786	0.173425	0.136324	0.176877	0.178602	0.127696
T.fasciatus pseudolatreillei	M	0.058	12.75	0.281569	0.555294	0.269804	0.185882	0.136471	0.172549	0.177255	0.135686
T.fasciatus pseudolatreillei	M	0.051	12.22	0.271686	0.521277	0.265957	0.178396	0.162029	0.177578	0.194763	0.139116
T.fasciatus pseudolatreillei	M	0.043	11.81	0.281964	0.536833	0.268417	0.179509	0.15072	0.175275	0.19475	0.137172
T.fasciatus pseudolatreillei	M	0.054	12.86	0.293157	0.537325	0.265163	0.178849	0.150855	0.177294	0.186625	0.134526
T.fasciatus pseudolatreillei	M	0.059	12.93	0.331013	0.538283	0.274555	0.180974	0.149265	0.180974	0.174014	0.131477
T.fasciatus pseudolatreillei	M	0.048	12.08	0.264901	0.530629	0.271523	0.179636	0.157285	0.175497	0.193709	0.136589
T.fasciatus pseudolatreillei	F	0.041	12.2	0.289344	0.566393	0.266393	0.17623	0.127869	0.169672	0.180328	0.136066
T.fasciatus pseudolatreillei	M	0.057	12.96	0.277778	0.540123	0.261574	0.175926	0.155864	0.175154	0.19213	0.128858
T.fasciatus pseudolatreillei	F	0.048	12.04	0.30814	0.553987	0.272425	0.169435	0.142027	0.168605	0.192691	0.135382
T.fasciatus pseudolatreillei	M	0.047	12.37	0.267583	0.556993	0.279709	0.187551	0.120453	0.187551	0.201293	0.135004
T.fasciatus pseudolatreillei	M	0.057	13.05	0.283525	0.542529	0.267433	0.183142	0.144828	0.17931	0.190805	0.133333
T.fasciatus pseudolatreillei	F	0.044	12.56	0.276274	0.553344	0.265127	0.167994	0.137739	0.169586	0.195064	0.139331
T.fasciatus pseudolatreillei	F	0.043	10.96	0.296533	0.577555	0.286496	0.181569	0.122263	0.175182	0.166971	0.125
T.fasciatus pseudolatreillei	M	0.04	12.33	0.27575	0.527981	0.269262	0.184915	0.158151	0.178427	0.183293	0.135442
T.fasciatus pseudolatreillei	M	0.055	12.68	0.277603	0.547319	0.268139	0.184543	0.141956	0.182177	0.194006	0.128549
T.fasciatus pseudolatreillei	M	0.049	12.53	0.26656	0.526736	0.269753	0.184358	0.15403	0.182761	0.194733	0.136472
T.fasciatus pseudolatreillei	F	0.032	12.44	0.27492	0.554662	0.262862	0.173633	0.151125	0.165595	0.176849	0.128617
T.fasciatus pseudolatreillei	M	0.046	12.19	0.277276	0.54799	0.269073	0.179655	0.135357	0.176374	0.19114	0.140279
T.fasciatus pseudolatreillei	F	0.037	12.32	0.280032	0.54789	0.272727	0.176136	0.138799	0.174513	0.198864	0.138799
T.fasciatus pseudolatreillei	M	0.052	12.03	0.266833	0.522028	0.272652	0.187864	0.157107	0.184539	0.197007	0.136326
T.fasciatus pseudolatreillei	M	0.048	13.15	0.286692	0.55057	0.261597	0.181749	0.140684	0.171103	0.190114	0.137643
T.fasciatus pseudolatreillei	M	0.033	11.93	0.269908	0.51886	0.273261	0.183571	0.165968	0.175189	0.206203	0.139983
T.fasciatus pseudolatreillei	F	0.043	12.64	0.274525	0.534019	0.268987	0.178797	0.155063	0.174842	0.188291	0.136076
T.fasciatus pseudolatreillei	M	0.043	12.77	0.282694	0.519186	0.267815	0.189507	0.168363	0.18011	0.18794	0.132341
T.fasciatus pseudolatreillei	M	0.052	12.1	0.28595	0.533058	0.286777	0.195041	0.157025	0.183471	0.184298	0.126446
T.fasciatus pseudolatreillei	M	0.049	12.44	0.294212	0.554662	0.269293	0.184887	0.135048	0.185691	0.180064	0.124598
T.fasciatus pseudolatreillei	M	0.059	12.78	0.280908	0.539124	0.266041	0.187011	0.14867	0.182316	0.177621	0.12989
T.fasciatus pseudolatreillei	M	0.038	12.11	0.274154	0.565648	0.281585	0.181668	0.136251	0.17341	0.169282	0.12469
T.fasciatus pseudolatreillei	F	0.044	12.31	0.283509	0.543461	0.26645	0.174655	0.139724	0.177092	0.199838	0.139724
T.fasciatus pseudolatreillei	M	0.055	12.81	0.303669	0.5363	0.264637	0.180328	0.156128	0.181109	0.185012	0.126464
T.fasciatus pseudolatreillei	M	0.047	12.64	0.303006	0.547468	0.265032	0.176424	0.14557	0.170095	0.186709	0.136867
T.fasciatus pseudolatreillei	M	0.06	12.82	0.279251	0.528861	0.25429	0.180187	0.155226	0.174727	0.177067	0.141186
T.fasciatus pseudolatreillei	M	0.052	12.52	0.31869	0.5623	0.272364	0.18131	0.150958	0.169329	0.170927	0.117412
T.fasciatus pseudolatreillei	F	0.046	12.29	0.280716	0.554109	0.270138	0.171684	0.144833	0.165989	0.185517	0.135069
T.fasciatus pseudolatreillei	M	0.039	11.27	0.27063	0.535049	0.277728	0.181012	0.162378	0.1748	0.181012	0.127773
T.fasciatus pseudolatreillei	M	0.044	11.44	0.284965	0.536713	0.29021	0.181818	0.152098	0.175699	0.188811	0.13549
